# Supplementary material for: Isoprenoid Biosynthesis Pathway Enzymes As Promising Drug Candidates Against Malaria Parasites: An In-Silico Investigation
Source: Preprints.org preprint supplement (doi:10.20944/preprints202312.0032.v1), 2023-12-01
Supplement: Supplementary file 1 [file supplementary]

**Supplementary data**

**Isoprenoid Biosynthesis Pathway Enzymes as Promising Drug Candidates Against Malaria Parasites: An In-Silico Investigation**

Kuldeep Gupta 1, Gagandeep Singh Saggu 2*

1 Russel H. Morgan, Department of Radiology and Radiological Sciences, School of Medicine, Johns Hop-kins University, Baltimore, MD 21287, USA; kgupta14@jhmi.edu

2 Laboratory of Malaria and Vector Research, National Institute of Allergy and Infectious Diseases, National Institutes of Health, Rockville, MD, USA; gagan.saggu@nih.gov

* Correspondence: gagan.saggu@nih.gov; saggugagan.2007@gmail.com; Tel.: (+1 240-665-0263)


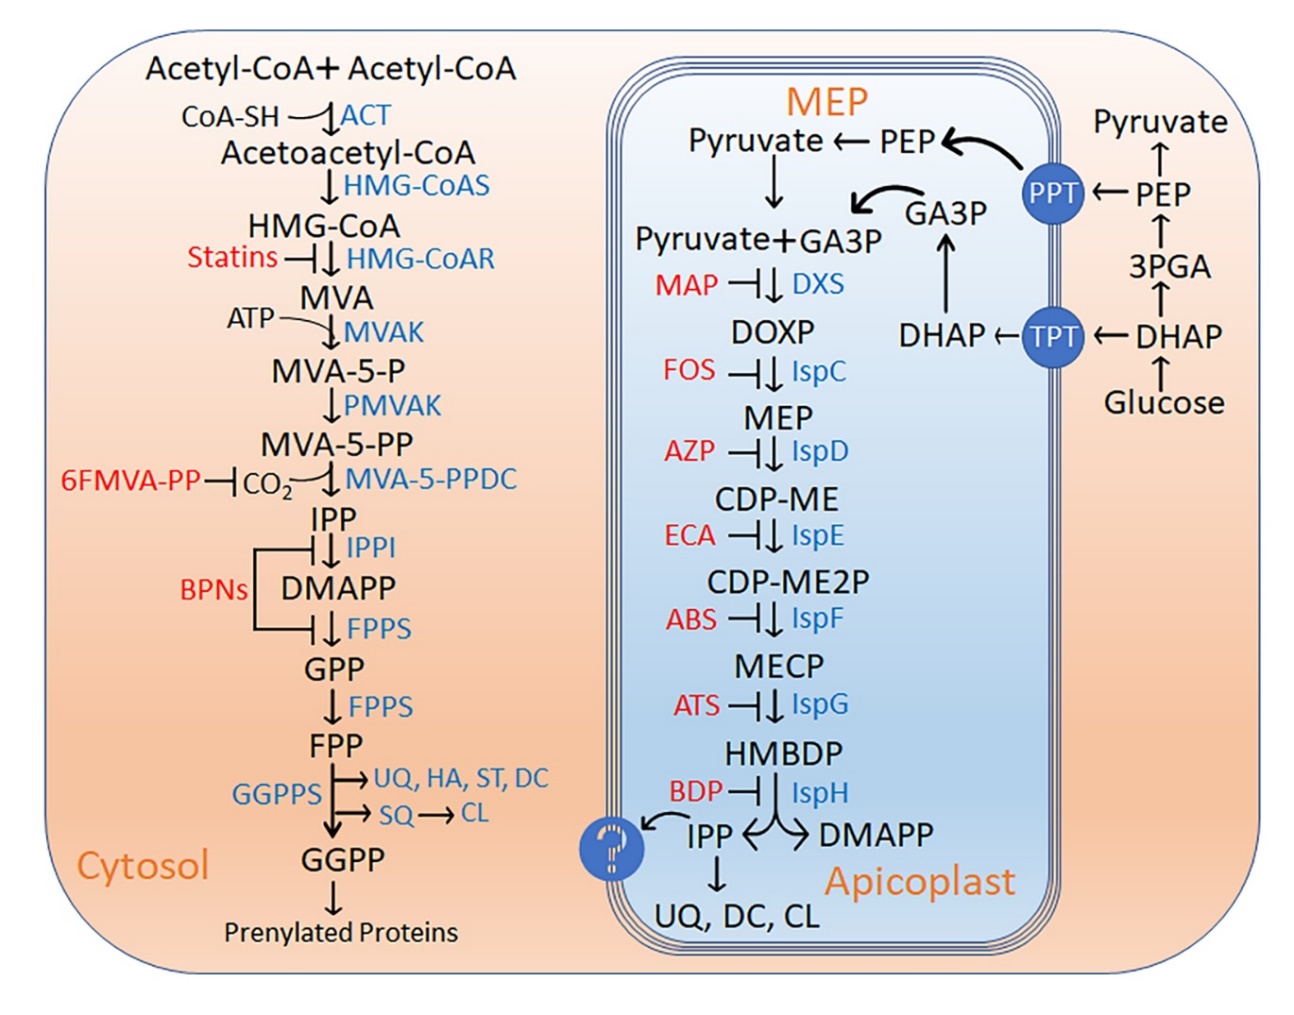


**Figure 1: Isoprenoid biosynthesis by mevalonate dependent (MVA) and non-mevalonate pathway (MEP) in a typical cell.** Isoprenoids are derived from the basic 5-carbon isoprenoid building blocks IPP and its isomer, DMAPP. In the MVA pathway, IPP and DMAPP are synthesized by condensation of acetyl CoA. Enzymes participating in this pathway are ACT, HMGS, HMGR, MVK, PMK, and MDS. Statins inhibit HMGR, the rate-limiting enzyme of the mevalonate pathway, and 6FMVA-PP and BPNs inhibit the other steps of the pathway. In the MEP pathway, IPP and DMAPP are generated from pyruvate and GA3P. Enzymes of this pathway are named here according to their *E. coli* homologs (DXS, IspC, IspD, IspE, IspF, IspG, and IspH). KCZ and FOS inhibit the rate-limiting steps of this pathway and blocks isoprenoids biosynthesis**.**

Abbreviations used: 3PGA; 3-Phospho-glyceraldehyde, 6FMVA-PP; 6-Fluoro-mevalonate-pyrophosphate, ABS; Aryl bis sulfonamide, ACT; Acyl CoA acetyl transferase, ATS; Atorvastatin, AZP; Azolopyrimidine, BDP; (E)-4-mercapto-3-methyl but-2-enyl diphosphate, BPNs; Bisphosphonates, CDP-ME; 4-diphosphocytidyl-2C-methyl-D-erythritol, CDP-ME2P; 4-diphosphocytidyl-2C-methyl-D-erythritol -2-phosphate, CL; Cholesterol, DC; Dolichols, DHAP; Dihydroxy acetone phosphate, DMAPP; Dimethylallyl pyrophosphate, DXS; 1-deoxy-D-xylose-5-phosphate synthase, DOXP; 1-deoxy-D-xylose-5-phosphate, DXS; 1-Deoxy-D-xylulose 5-phosphate synthase, ECA; ethyl {3-[4-amino-5-{3-[(cyclopropyl sulfonyl)amino] prop-1-yn-1-yl}-2-oxopyrimidin-1(2H)-yl] oxetan-3-yl}acetate, FOS; Fosmidomycin, FPP; Farnesyl diphosphate, FPPS; Farnesyl diphosphate synthase, GA3P; Glyceraldehyde-3-phosphate, GGPP; Geranyl geranyl pyrophosphate, GGPS; Geranyl geranyl pyrophosphate synthase, GPP; Geranyl pyrophosphate, HA; Heme A, HMBDP; 4-Hydroxy-3-methyl-2-(E)-butenyl-4-diphosphate, HMG-CoAS; 3-Hydroxyl-3-methylglutaryl-CoA synthase, HMG-CoA; 3-Hydroxy-3-methylglutaryl-CoA, HMG-CoAR; 3-Hydroxyl-3-methylglutaryl-CoA reductase, IPP; Isopentenyl-5-pyrophosphate, IPPI; Isopentenyl-5-pyrophosphate isomerise, IspC; 2C-methyl-D-erythritol 4-phosphate synthase, IspD; 4-Diphosphocytidyl-2C-methyl-D-erythritol synthase, IspE; 4-Diphosphocytidyl-2C-methyl-D-erythritol kinase, IspF; 2C-Methyl-D-erythritol 2,4-cyclodiphosphate synthase, IspG; 2C-Methyl-D-erythritol 2,4-cyclodiphosphate reductase, IspH; 1-Hydroxy-2-methyl-2-(E)-butenyl-4-diphosphate reductase, KCZ; Ketoclomazone, MAP; Methylacetylphosphonate, MECP; 2C-metyl-D-erythritol 2,4-cyclodiphosphate, MEP; 2C-Methyl-D-erythritol 4-phosphate, MVA; Mevalonic acid, MVA-5-P; Mevalonate-5-phosphate, MVA-5-PP; Mevalonate-5-pyrophosphate, MVA-5-PPDC; Mevalonate-5-pyrophosphate decarboxylase, MVAK; Mevalonate kinase, PEP; Phosphoenolpyruvate, PPT; Phosphoenolpyruvate transporter, PMVAK; Phosphomevalonate kinase, SQ; Squalene, ST; Sterol, TPT; Triose-phosphate transporter, UQ; Ubiquinones.


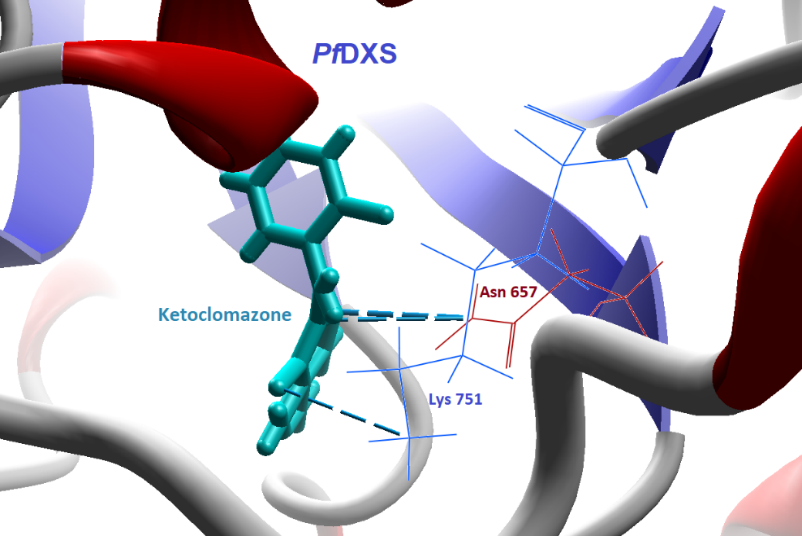


**Figure S1**: *Pf*DXS enzyme interaction with ketoclomazone (KCZ). The interaction between the *Pf*DXS enzyme and ketoclomazone was investigated through docking analysis using Molegro Virtual Docker. The analysis revealed a notable interaction involving conserved amino acids, specifically Asn 657 and Lys 751.


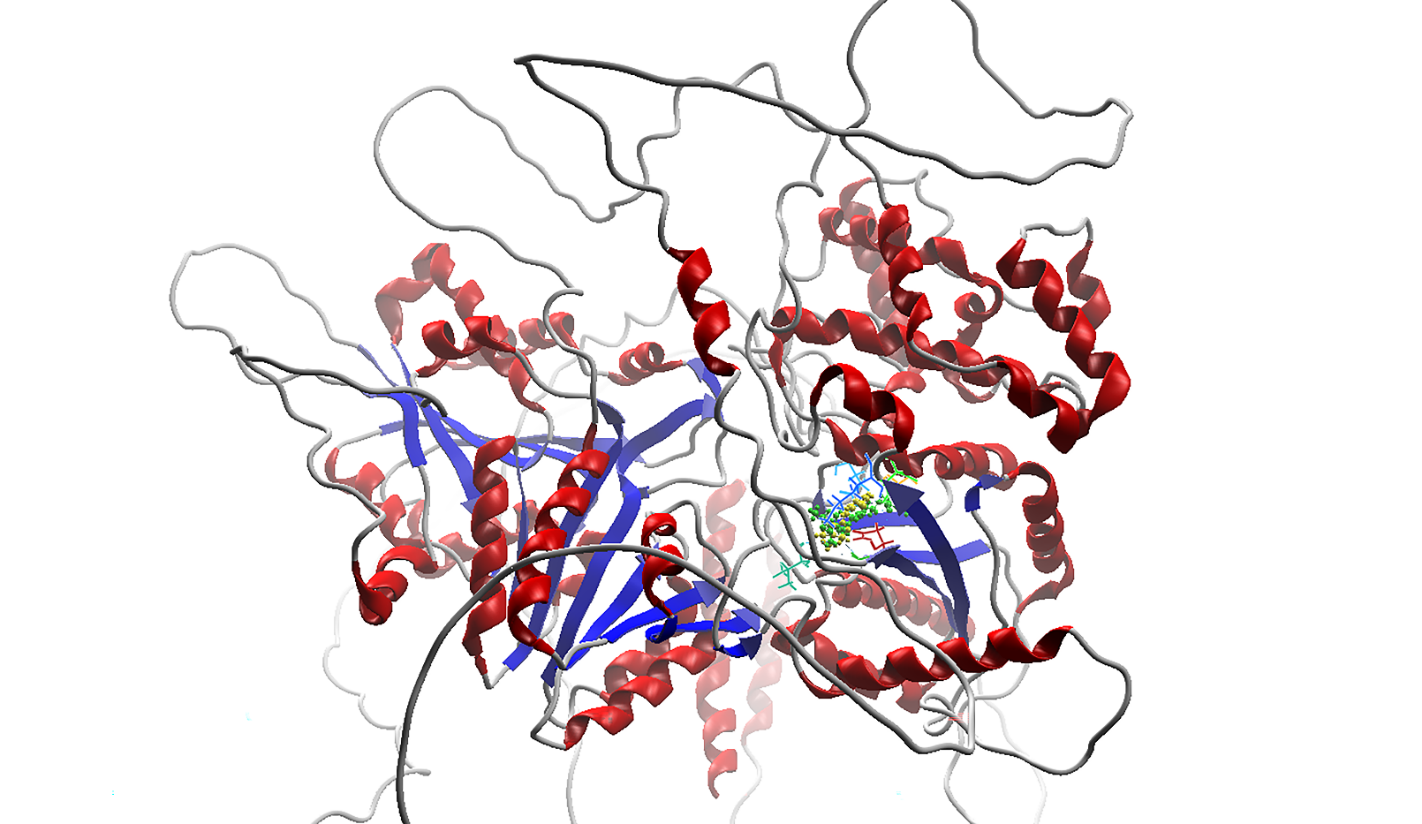


**Figure S2**: *Pf*DXS interaction with TPP (green) and KCZ (Yellow). The comprehensive structure of the *Pf*DXS enzyme, including its full length, was visualized alongside the docked molecules TPP (green) and KCZ (yellow). This representation emphasizes that both TPP and KCZ bind to a common binding site, interacting with conserved residues. This observation underscores the competitive inhibition of KCZ with the enzyme-substrate TPP.


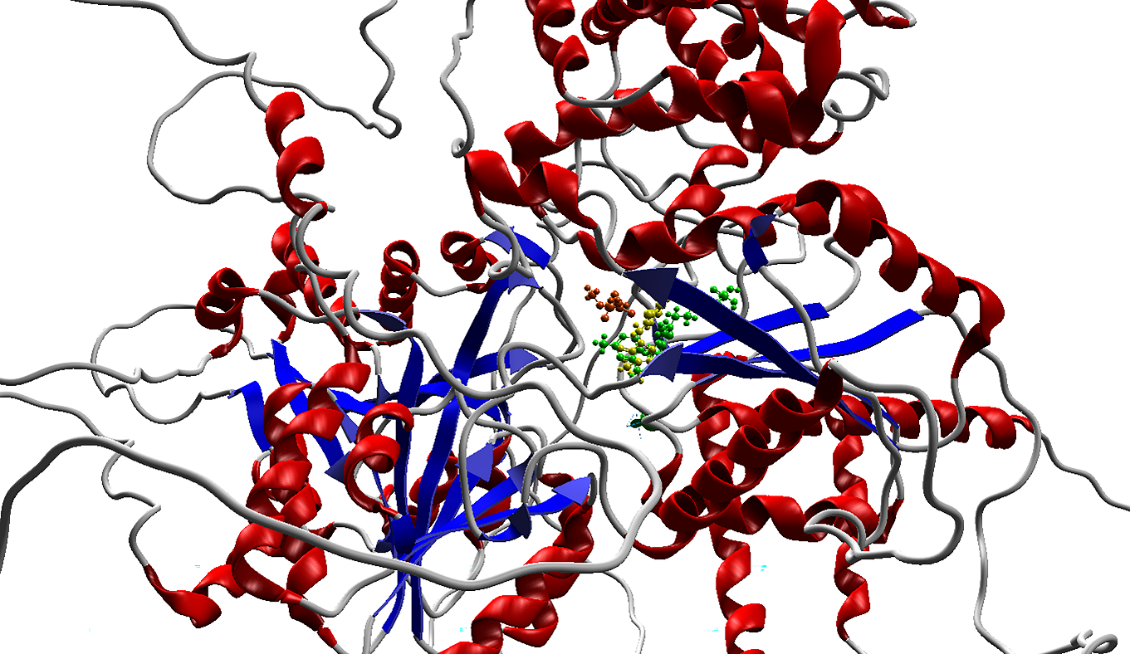


**Figure S3**: *Pf*DXS interaction with TPP (green), pyruvate (Yellow), and MAP (red).
The complete structure of the *Pf*DXS enzyme demonstrates its interaction with the enzyme-substrate TPP and MAP at the catalytic site. Notably, MAP binds adjacent to TPP, sharing binding amino acid residues such as Lys 751.


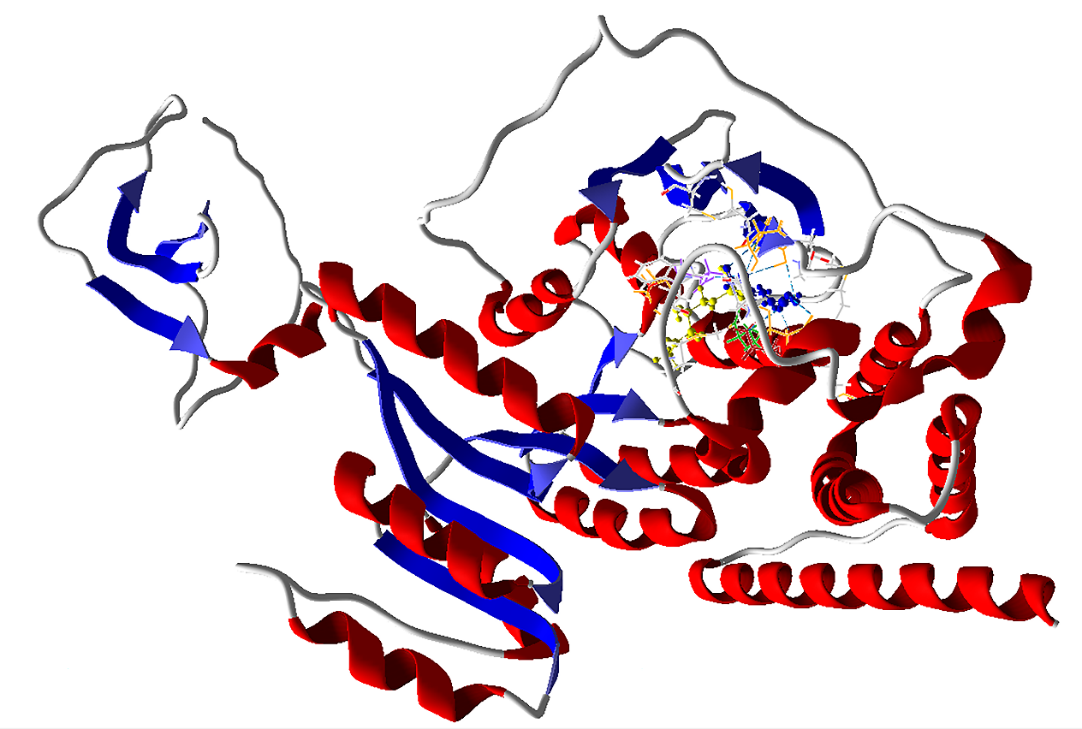


**Figure S4**: *Pf*IspC interaction with DOXP (Yellow) and Fos (Blue).
The complete structure of the *Pf*IspC enzyme underwent docking analysis against the enzyme-substrate DOXP and the inhibitor Fos, both binding to a shared cavity containing conserved residues. These molecules share amino acid residues, including Glu 233, Ser 270, Ser 306, Asn 311, and Lys 312, which elucidates their competitive inhibition. The phosphate group present in Fos and its analogs plays a crucial role in binding to the *Pf*IspC enzyme.


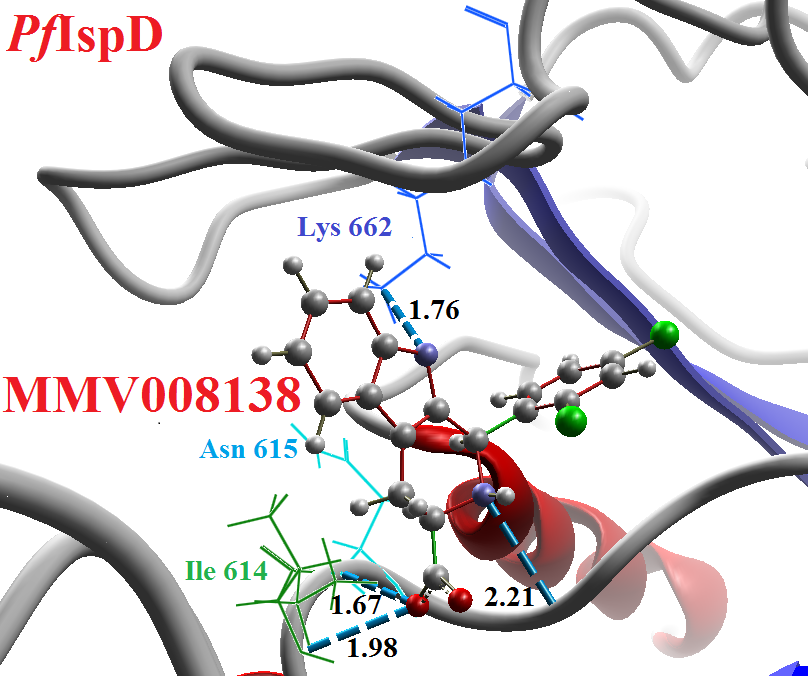


**Figure S5**: *Pf*IspD enzyme interaction with MMV008138. The interaction between the *Pf*IspD enzyme and MMV008138 (a drug candidate from the Malaria Box venture) was investigated, revealing a significant interaction with the conserved amino acid residue Lys 662. This residue holds crucial importance for the catalytic activity of the enzyme.


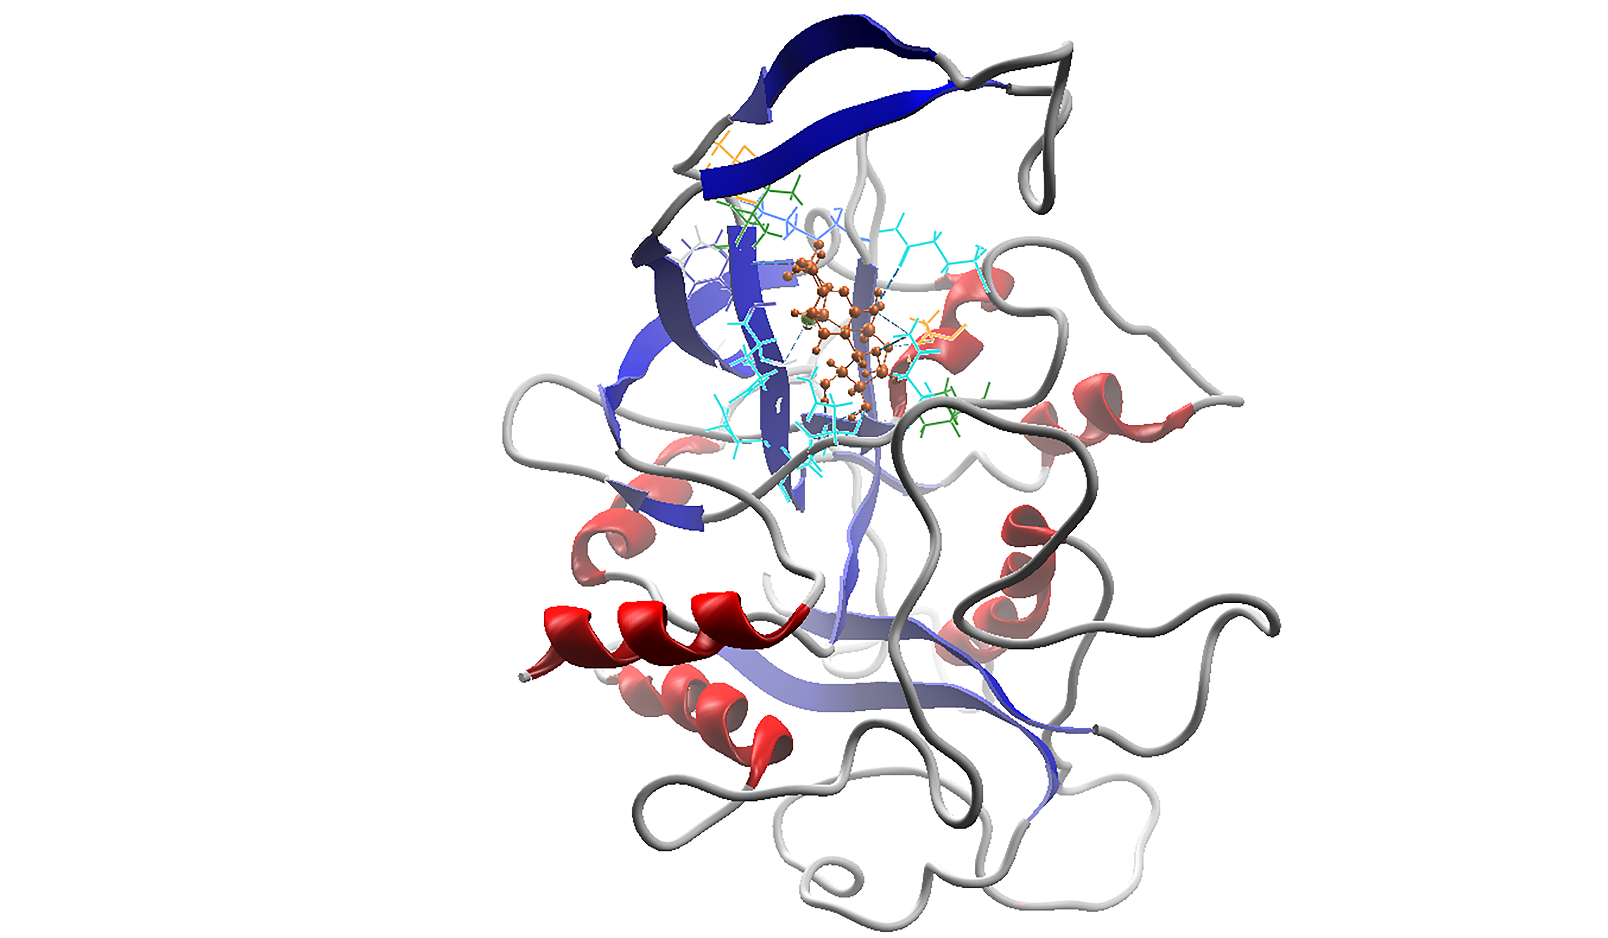


**Figure S6**: *Pf*IspD interaction with CTP (Red).
Docking analysis was conducted for the enzyme-substrate CTP, which serves as a phosphate group donor in the reaction, facilitating the elongation of the MEP substrate. CTP binds proximately to the MEP substrate, sharing common amino acid residues for its interaction with the *Pf*IspD enzyme.


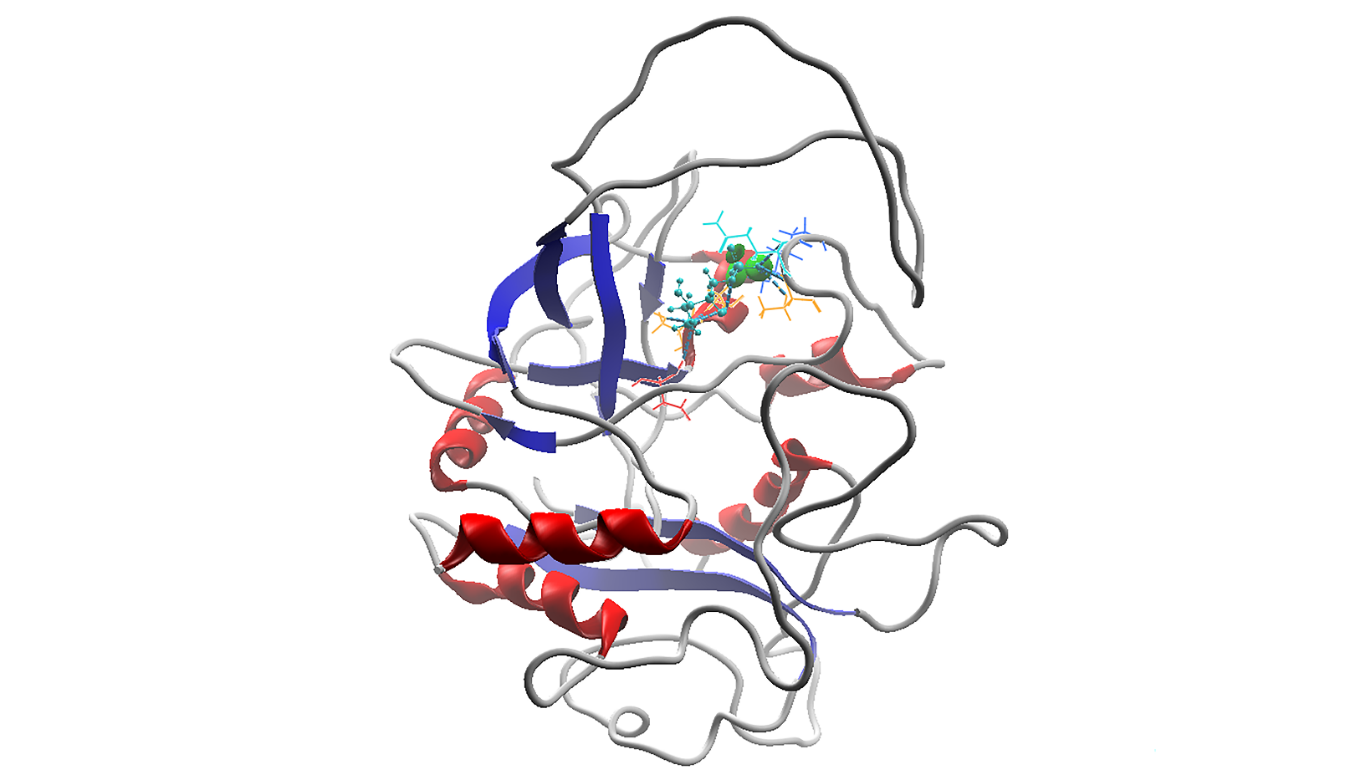


**Figure S7**: *Pf*IspD interaction with MEP (Cyan). Docking analysis was performed for the enzyme-substrate MEP, which functions as a phosphate group acceptor in the enzymatic reaction, ultimately forming CDP-ME that acts as a substrate for subsequent reactions. MEP binds in close proximity to the CTP substrate, sharing common amino acid residues for its interaction with the *Pf*IspD enzyme.
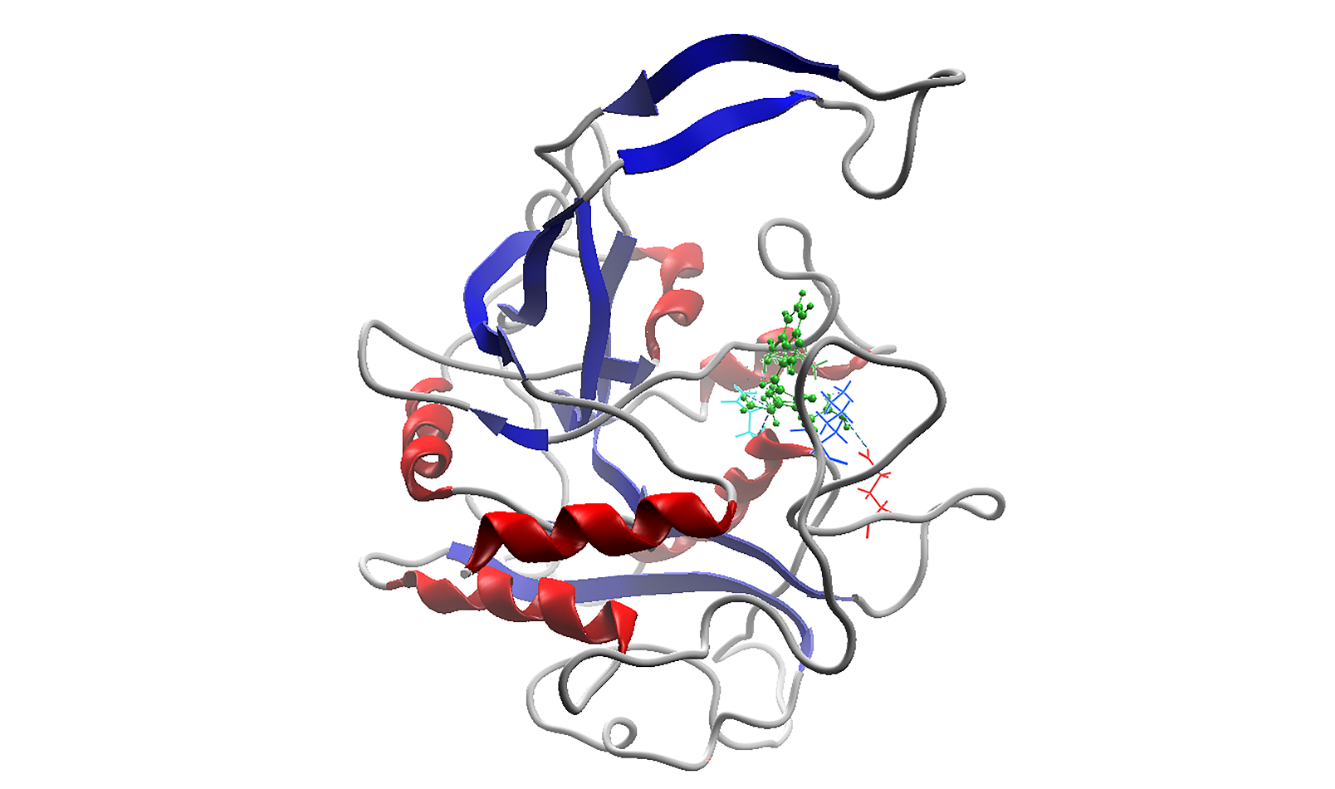


**Figure S8**: *Pf*IspD interaction with Azolopyrimidine (Green). Pyrimidine, containing the phosphate group, exhibits interaction with the IspD enzyme. Additionally, azolopyrimidines demonstrate interactions with residues commonly associated with the binding of both CTP and MEP substrates.


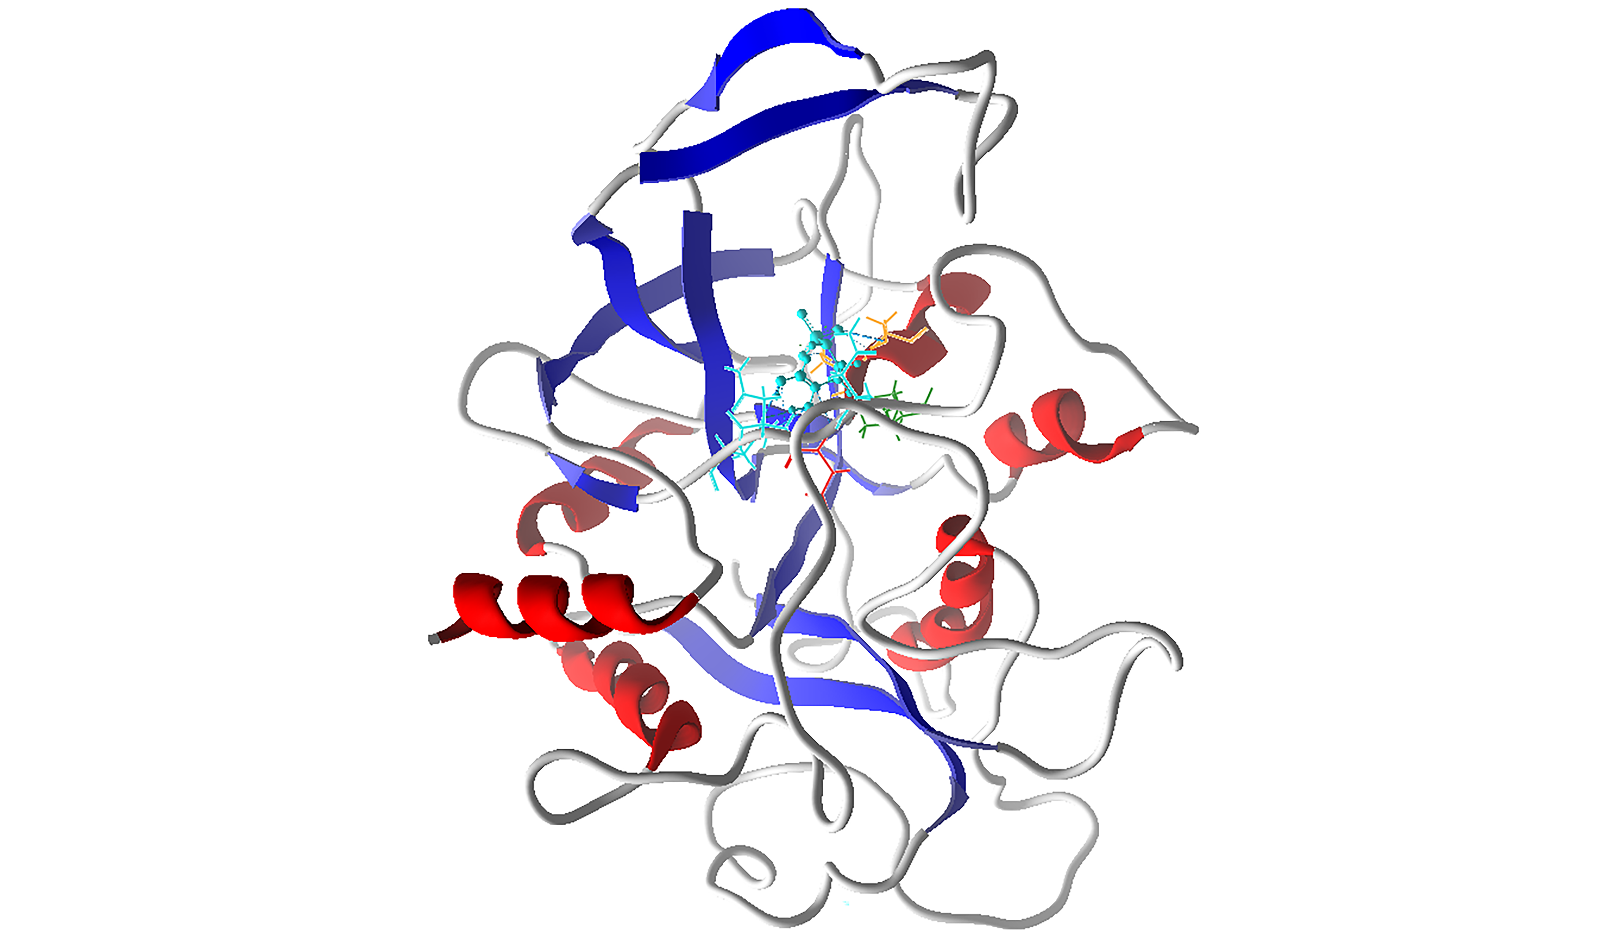


**Figure S9**: *Pf*IspD interaction with Fosmidomycin (Cyan).
Fos was subjected to docking analysis with the *Pf*IspD enzyme, exploiting the binding site similarities between IspC and IspD enzymes, leading to the formation of a comparable binding cavity. Notably, the phosphate group in Fos exhibited heightened interactions with positively charged amino acid residues situated within the binding cavity. Fos also serves as a competitive inhibitor, sharing amino acid residues with CTP and MEP.


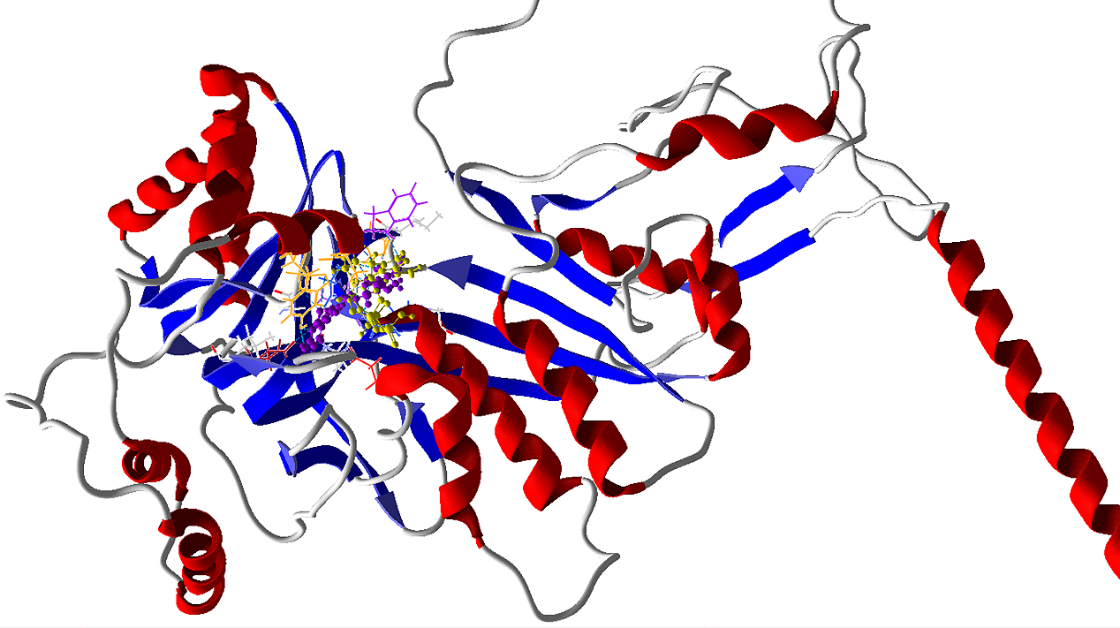


**Figure S10**: *Pf*IspE interaction with CDP-ME (purple) and ATP (Yellow). Similar to *Pf*IspD, *Pf*IspE also involves two substrates, CDP-ME, and ATP, which exhibit interactions with each other as well as with the amino acid residues in the catalytic site. These substrates bind in close proximity, sharing common amino acid residues within the binding site.


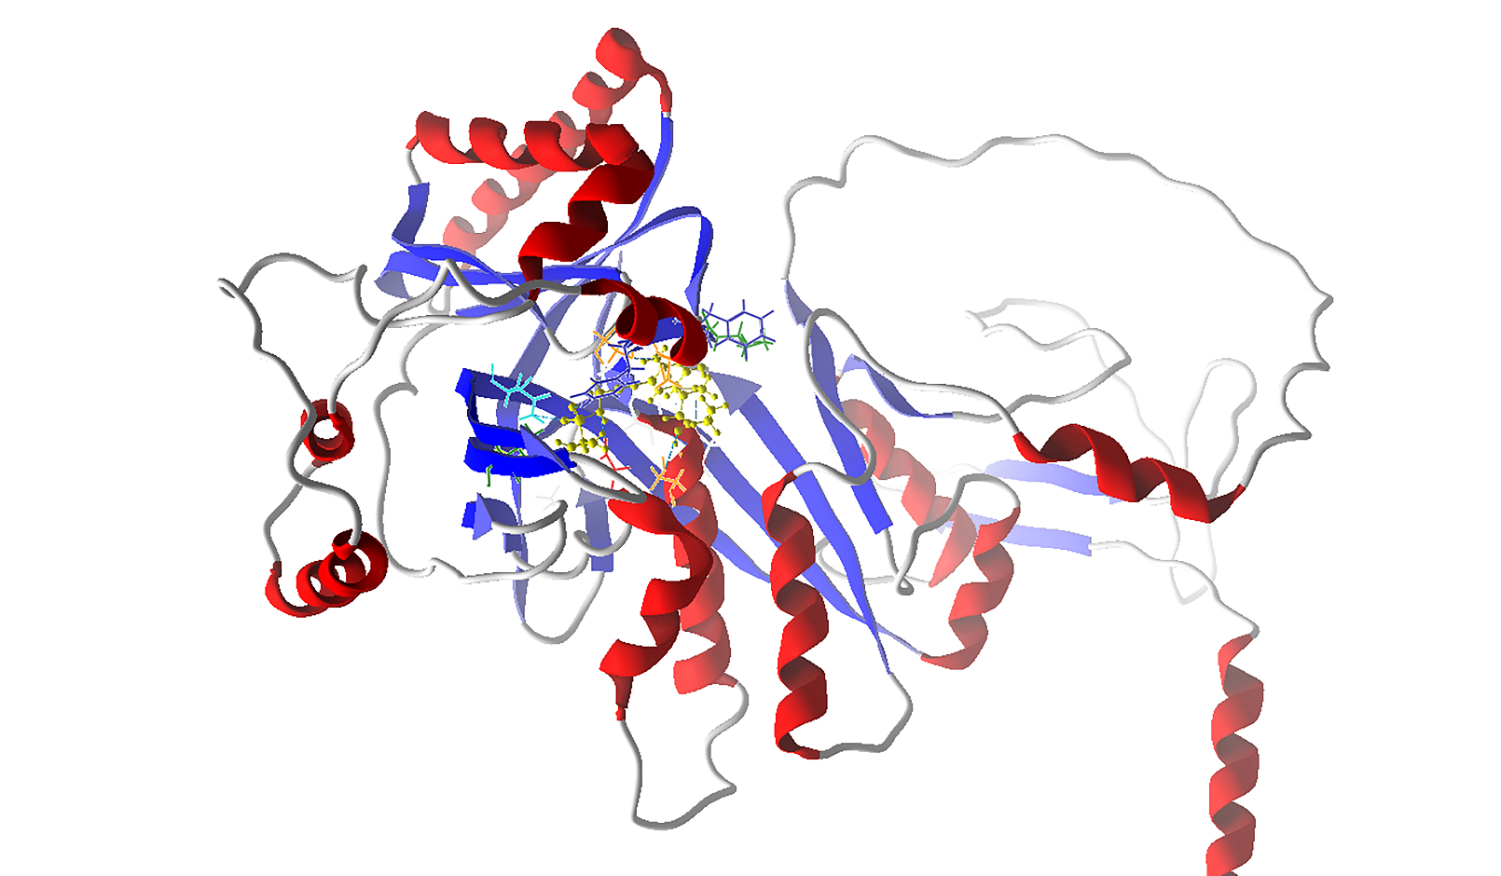


**Figure** **S11**: *Pf*IspE interaction with ethyl {3-[4-amino-5-{3-[(cyclopropyl sulfonyl)amino] prop-1-yn-1-yl}-2-oxopyrimidin-1(2H)-yl] oxetan-3-yl}acetate (Yellow). High-Throughput Screening (HTS) was conducted to identify various inhibitors capable of binding to the *Pf*IspE enzyme. Through docking analysis, cyclopropyl sulfonyl emerged as a potent inhibitor, exhibiting binding interactions with conserved catalytic residues.


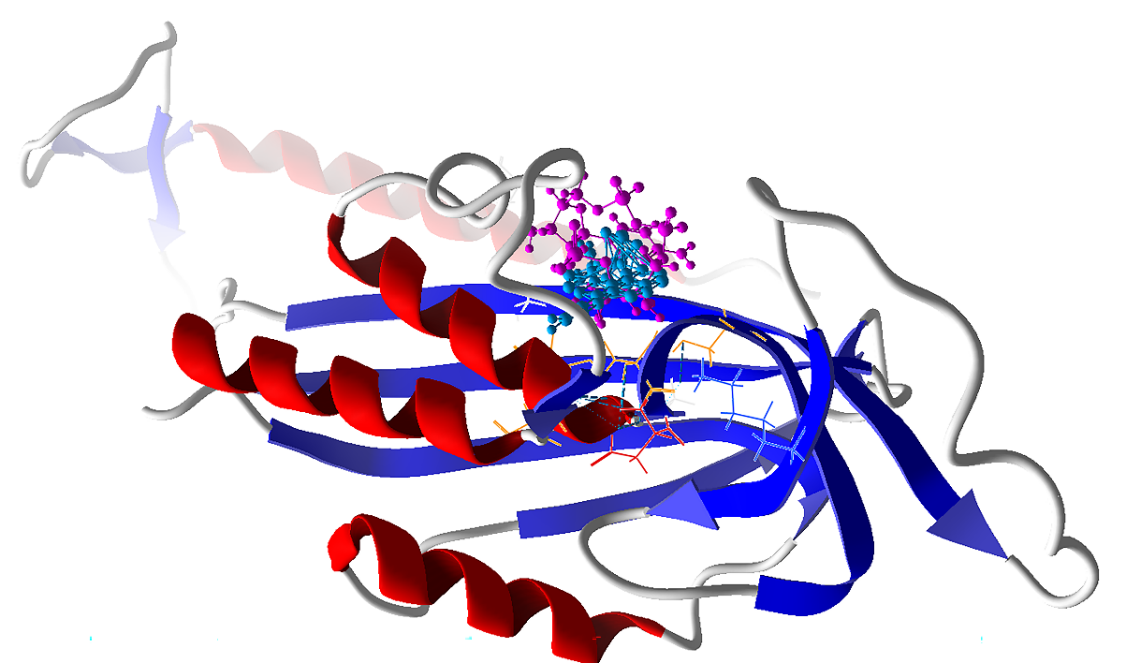


**Figure S12**: *Pf*IspF interaction with CDP-ME-2P (Purple) and aryl bis sulfonamide (Blue). The full-length *Pf*IspF enzyme was subjected to docking analysis against the CDP-ME-2P substrate and the inhibitory molecule Bis-sulfonamide, identified through High-Throughput Screening (HTS). Both molecules bind to conserved amino acid residues Ser 114, His 115, and Ser 116, indicating a competitive behavior of the inhibitor.


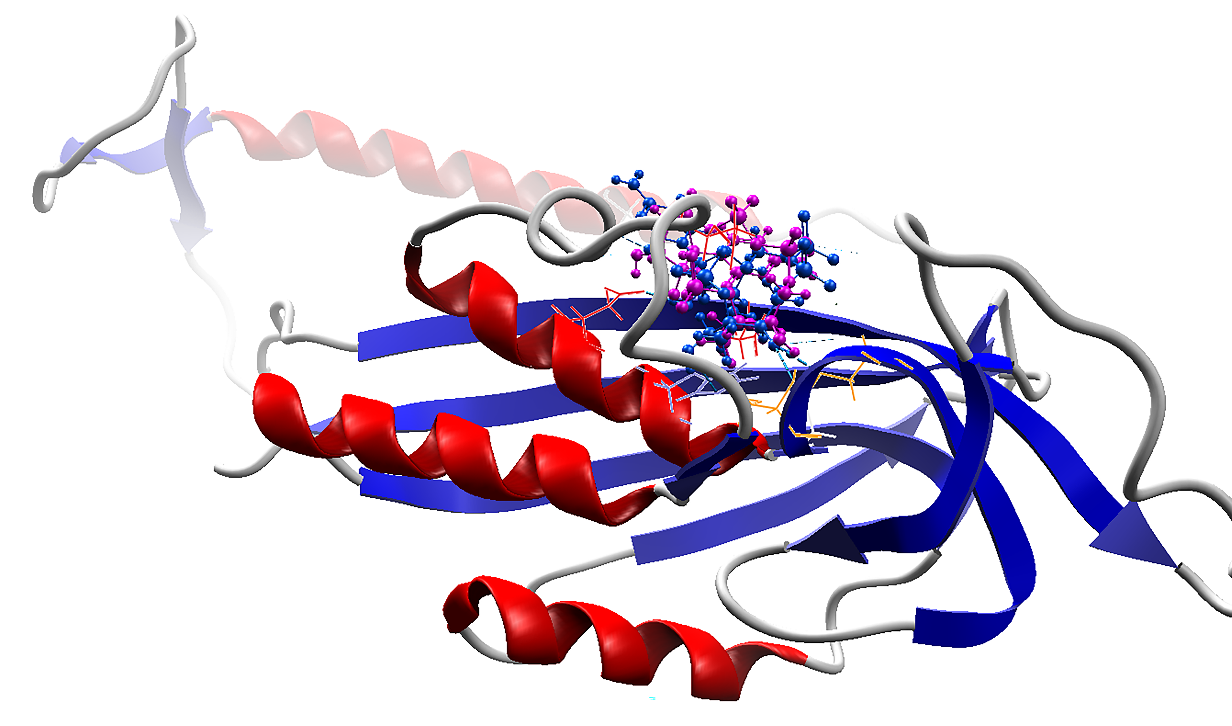


**Figure S13**: *Pf*IspF interaction with CDP-ME-2P (Purple) and Ethyl (2Z)-2-(3,5-Dibromo-4-hydroxybenzylidene)-7-methyl-3-oxo-5-(2-thienyl)-2,3-dihydro-5H-[1,3]thiazolo[3,2-a]pyrimi-dine-6-carboxylate (Blue).
The inhibitor hydroxy benzylidene, identified through High-Throughput Screening (HTS), also binds with conserved residues Ser 114 and His 115 in *Pf*IspF. These residues are found to be conserved in various IspF enzymes from different organisms.


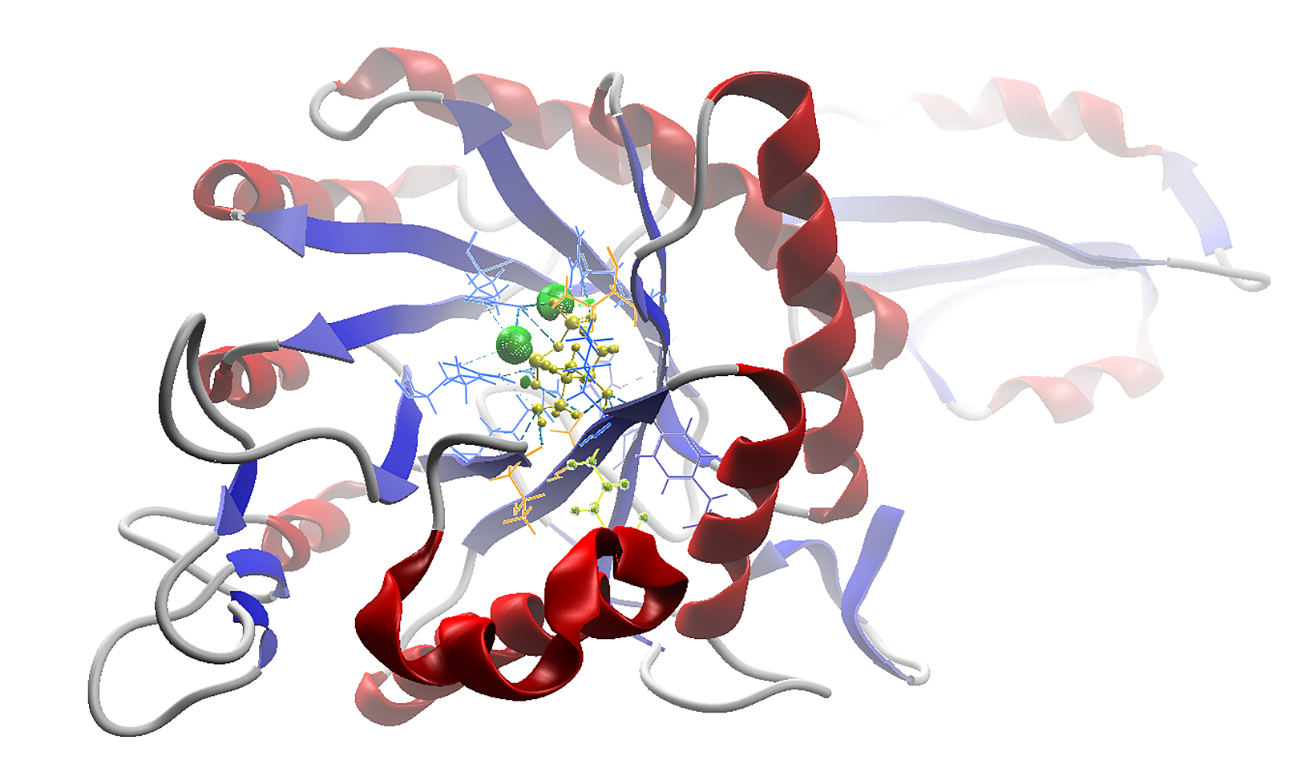


**Figure S14**: *Pf*IspG interaction with MECP substrate (yellow).
The *Pf*IspG enzyme forms a conserved core with arginine residues, serving as the binding site for the MECP substrate. Following substrate binding, the cap region, facilitated by the 4Fe-4S cluster, envelops this core region, creating a closed conformation conducive to catalytic reactions. In the docking analysis, interactions were observed between the MECP substrate and the conserved residues in the beta sheets of the core region. Notably, the binding of the Fe-S cluster towards the C-terminal conserved cysteine residues plays a critical role in this process.


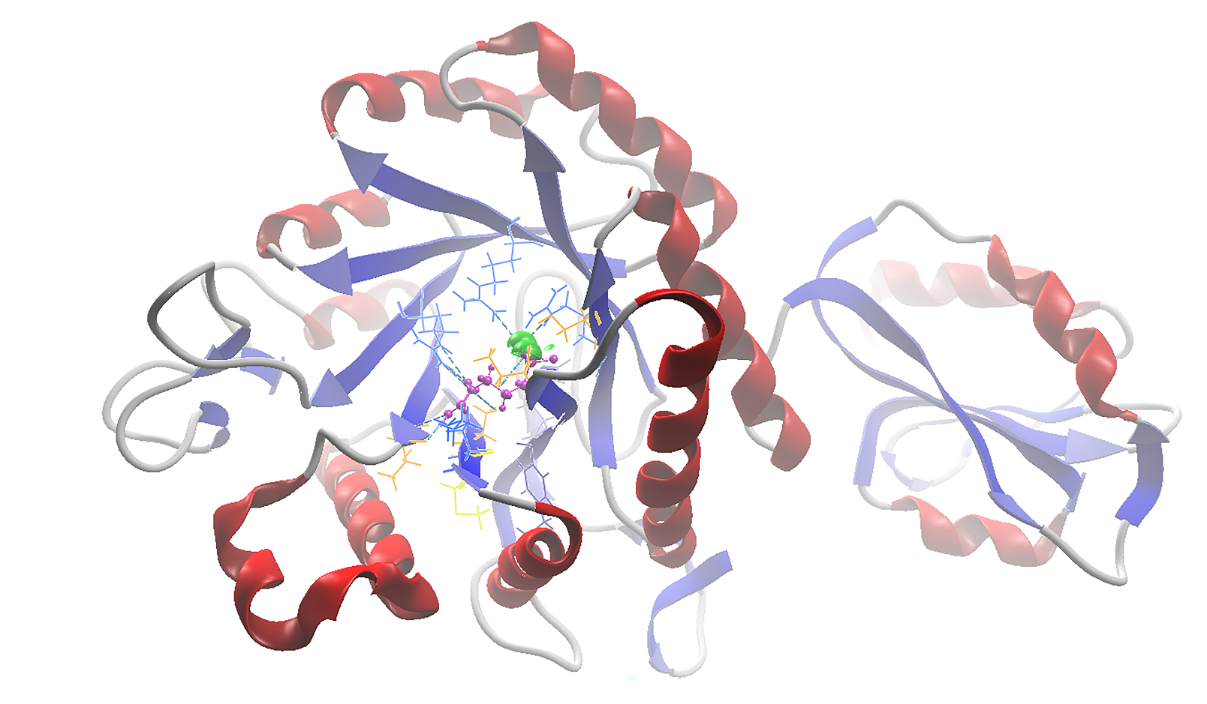


**Figure S15**: *Pf*IspG interaction with Fosmidomycin (Purple).
In the docking analysis, Fos demonstrated interactions with the conserved residues in the core region, facilitated by the phosphate group's interaction with positively charged arginine residues. The binding of Fos in the core region has the potential to impede the binding of the 4Fe-4S cluster. Even in the absence of the MECP substrate, this interaction could hinder the production of HMBDP.


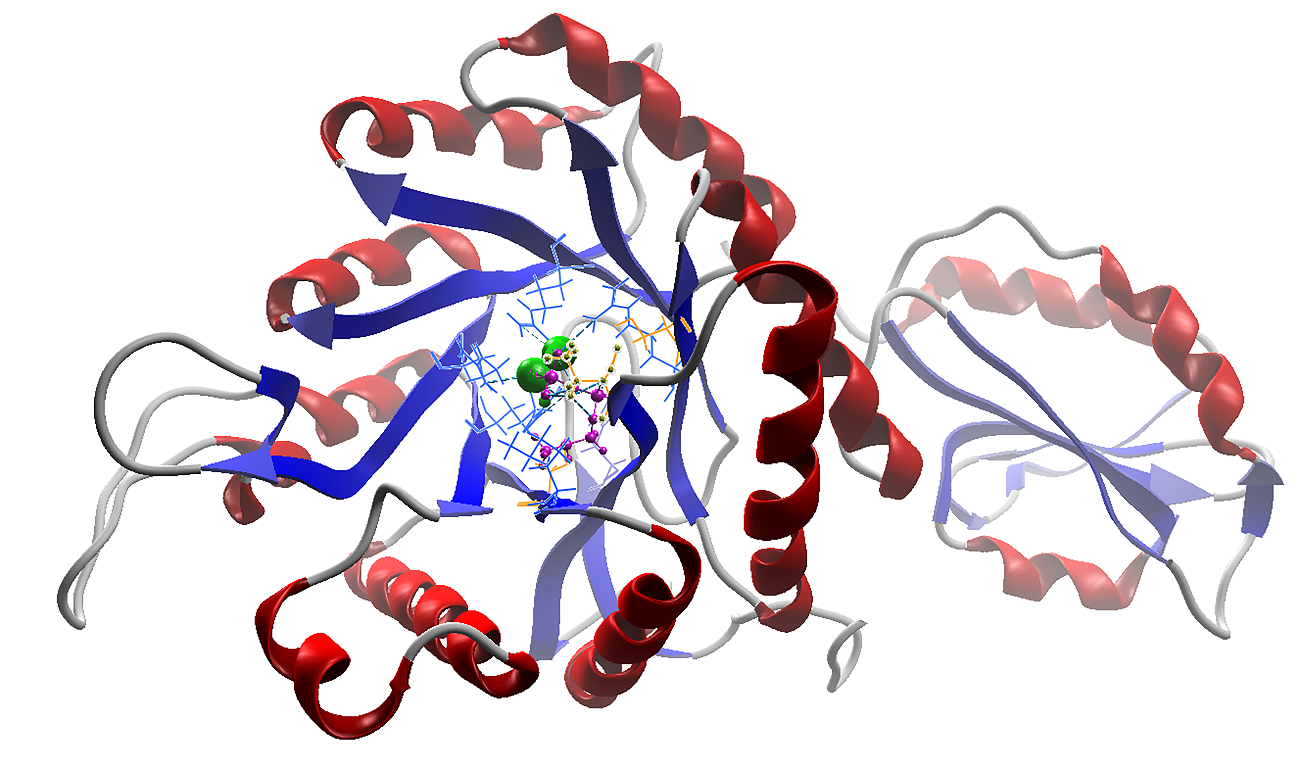


**Figure S16**: *Pf*IspG interaction with Prop-2-yn-1-yl trihydrozen di phosphate (Purple).
The inhibitor obtained via High-Throughput Screening (HTS) follows a similar mechanism by binding to positively charged residues, thereby impacting the catalytic reaction of the *Pf*IspG enzyme.


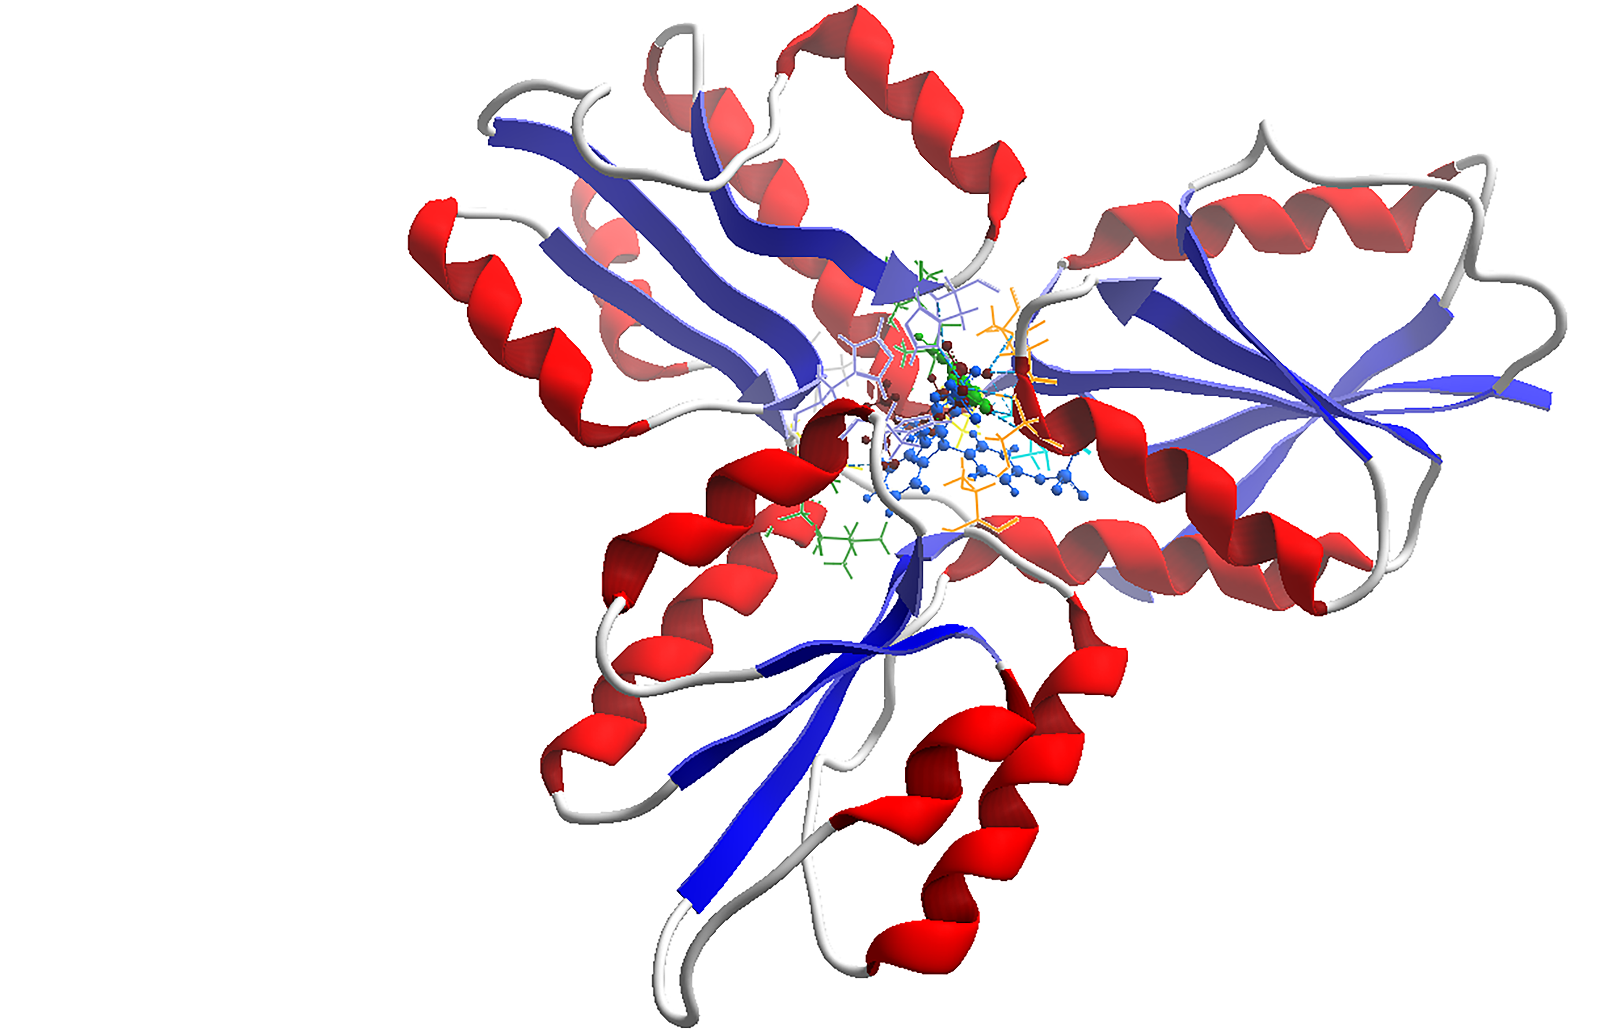


**Figure S17**: *Pf*IspH interaction with HMBDP substrate (brown), (E)-4-mercapto-3-methyl but-2-enyl diphosphate (green) and Phenolphthalein diphosphate pyridine -(Blue). In the docking analysis, these inhibitors identified through HTS were found to interact with amino acid residues aligned in the catalytic activity site. Additionally, they shared amino acid residues with the substrate HMBDP.

**Table S2:** Binding energies (Gibbs free energy) and binding affinity (Kd) for MEP pathway enzyme’s interaction with substrates and different inhibitors. Data available in the PDB server was used as a reference.

| **Proteins** | **Ligand molecule** | **Binding energy ΔG (Kj/mol)/ Binding affinity (Kd)** |
| --- | --- | --- |
| *P. falciparum* DXS | TPP | -110.63/ 2.1 x 105 |
| Pyruvate | -126.865/ 2.5 x 105 |
| MAP | -180.34/ 8.4 x 105 |
| *P. falciparum* IspC | DOXP | -275.434/ 9.35 x 106 |
| Fosmidomycin | -167.974/ 6.4 x 105 |
| *E. coli* IspD (1I52) | CTP | -289.658/ 9.85 x 106 |
| *M. tuberculosis* IspD (3Q80) | CDP-ME | -289.435/ 9.63 x 106 |
| *A. thaliana* IspD (2YC3) | Azolopyrimidines | -122.082/ 2.3 x 105 |
| *P. falciparum* IspD | CTP | -157.537/ 5.7 x 105 |
| MEP | -77.255/ 1.6 x 105 |
| CDP-ME | -150.985/ 5.4 x 105 |
| Fosmidomycin | -87.784/ 2.0 x 105 |
| MMV008138 | -128.078/ 2.42 x 105 |
| Azolopyrimidines | -151.686/ 5.6 x 105 |
| *P. falciparum* IspE | CDP-ME | -140.382/ 2.5 x 105 |
| ATP | -161.823/ 6.0 x 105 |
| Ethyl {3-[4-amino-5-{3-[(cyclopropyl sulfonyl)amino] prop-1-yn-1-yl}-2-oxopyrimidin-1(2H)-yl] oxetan-3-yl}acetate | -85.342/ 2.0 x 105 |
| *P. falciparum* IspF | CDP-ME-2P | -210.645/ 8.6 x 106 |
| Aryl bis sulfonamide | -180.54/ 8.4 x 105 |
| Hydroxy benzylidene | -174.36/ 7.4 x 105 |
| *T. thermophilus* IspG (4G9P) | MECP | -131.369/ 2.45 x 105 |
| *A. aeolicus* IspG (3NOY) | [4Fe-4S] cluster | -44.873/ 1.1 x 105 |
| *P. falciparum* IspG | MECP | -107.228/ 2.1 x 105 |
| [4Fe-4S] cluster | -42.136/ 1.0 x 105 |
| Atorvastatin | -167.325/ 6.1 x 105 |
| Fosmidomycin | -101.341/ 2.0 x 105 |
| Alkyne diphosphate | -140.101/ 2.5 x 105 |
| *P. falciparum* IspH | HMBDP | -124.87/ 2.4 x 105 |
| [4Fe-4S] cluster | -44.324/ 1.1 x 105 |
| (E)-4-mercapto-3-methyl but-2-enyl diphosphate | -180.34/ 8.4 x 105 |
| Phenolphthalein diphosphate pyridine | 155.64/ 5.62 x 105 |

**MSA Percent Identity Matrix - created by Clustal 2.1 for DXS enzyme**

1: *P_vivax*DXS 100.00 74.98 80.52 79.44 52.06 51.54 53.20 57.72 50.57 35.42 32.81 33.66 31.61 30.05 32.37 32.44 29.21 35.32 31.43 31.07

2: *P_knowlesi*DXS 74.98 100.00 80.90 78.86 51.79 51.42 52.74 57.47 50.56 34.81 31.11 31.82 29.67 29.98 30.66 31.70 28.57 34.72 29.56 30.12

3: *P_cynomolgi*DXS 80.52 80.90 100.00 87.18 54.15 52.15 54.18 60.26 51.04 36.68 33.90 35.25 33.40 32.14 32.87 33.60 28.99 37.16 31.61 31.42

4: *P_inui*DXS 79.44 78.86 87.18 100.00 52.83 52.00 53.63 58.92 51.76 34.66 31.77 32.34 29.40 29.22 30.73 31.70 28.15 35.36 29.47 30.18

5: *P_falciparum*DXS 52.06 51.79 54.15 52.83 100.00 56.42 57.16 61.89 56.09 33.84 32.87 34.13 28.62 32.22 32.71 33.56 27.10 34.57 30.33 31.02

6: *P_chabaudi*DXS 51.54 51.42 52.15 52.00 56.42 100.00 91.67 88.65 84.07 34.76 32.43 33.14 29.28 30.15 30.92 32.12 27.52 33.48 30.75 31.13

7: *P_vinckei*DXS 53.20 52.74 54.18 53.63 57.16 91.67 100.00 88.13 84.15 34.76 32.95 33.09 28.95 30.64 31.26 32.12 27.64 33.63 31.19 31.13

8: *P_berghei*DXS 57.72 57.47 60.26 58.92 61.89 88.65 88.13 100.00 91.40 34.92 32.71 33.86 29.67 30.82 30.55 31.76 29.69 32.49 29.73 30.43

9: *P_yoelii*DXS 50.57 50.56 51.04 51.76 56.09 84.07 84.15 91.40 100.00 34.25 33.33 34.18 28.27 29.13 29.88 31.03 25.80 31.77 29.48 30.32

10: *B_bovis*DXS 35.42 34.81 36.68 34.66 33.84 34.76 34.76 34.92 34.25 100.00 43.23 44.84 35.41 36.08 38.96 38.90 39.43 39.38 38.98 37.63

11: *T_parva*DXS 32.81 31.11 33.90 31.77 32.87 32.43 32.95 32.71 33.33 43.23 100.00 82.61 33.10 33.39 36.33 38.19 34.40 39.35 35.76 35.07

12: *T_annulata*DXS 33.66 31.82 35.25 32.34 34.13 33.14 33.09 33.86 34.18 44.84 82.61 100.00 34.01 33.89 36.75 37.88 36.34 40.79 36.23 36.99

13: *M_avium*DXS 31.61 29.67 33.40 29.40 28.62 29.28 28.95 29.67 28.27 35.41 33.10 34.01 100.00 39.64 41.24 38.98 36.78 39.84 39.42 39.34

14: *B_subtilus*DXS 30.05 29.98 32.14 29.22 32.22 30.15 30.64 30.82 29.13 36.08 33.39 33.89 39.64 100.00 44.70 44.94 41.52 43.55 43.18 44.46

15: *T_thermophilus*DXS 32.37 30.66 32.87 30.73 32.71 30.92 31.26 30.55 29.88 38.96 36.33 36.75 41.24 44.70 100.00 45.24 43.97 44.52 41.53 42.74

16: *E_coli*DXS 32.44 31.70 33.60 31.70 33.56 32.12 32.12 31.76 31.03 38.90 38.19 37.88 38.98 44.94 45.24 100.00 44.59 49.01 47.78 47.95

17: *T_gondii*DXS 29.21 28.57 28.99 28.15 27.10 27.52 27.64 29.69 25.80 39.43 34.40 36.34 36.78 41.52 43.97 44.59 100.00 52.23 47.24 48.18

18: *C_velia*DXS 35.32 34.72 37.16 35.36 34.57 33.48 33.63 32.49 31.77 39.38 39.35 40.79 39.84 43.55 44.52 49.01 52.23 100.00 52.59 54.11

19: *A_protothecoides*DXS 31.43 29.56 31.61 29.47 30.33 30.75 31.19 29.73 29.48 38.98 35.76 36.23 39.42 43.18 41.53 47.78 47.24 52.59 100.00 63.34

20: *A_thaliana*DXS 31.07 30.12 31.42 30.18 31.02 31.13 31.13 30.43 30.32 37.63 35.07 36.99 39.34 44.46 42.74 47.95 48.18 54.11 63.34 100.00

**MSA Percent Identity Matrix - created by Clustal 2.1 for IspC enzyme**

1: *T_thermophilus*IspC 100.00 45.35 41.69 47.96 41.64 43.93 43.17 43.32 37.06 34.99 36.51 35.69 35.69 35.69 35.42 35.42 34.88 39.61 37.75 37.95

2: *M_avium*IspC 45.35 100.00 41.08 43.73 40.76 42.98 42.82 43.64 34.48 34.56 35.01 34.22 34.67 34.93 34.67 33.60 33.07 36.86 36.41 34.96

3: *E_coli*IspC 41.69 41.08 100.00 43.04 41.95 46.17 43.64 43.30 37.78 35.66 37.03 37.03 35.52 37.03 38.04 36.78 36.02 38.82 35.43 35.92

4: *T_gondii*IspC 47.96 43.73 43.04 100.00 47.52 46.59 41.76 44.93 35.90 34.37 35.34 34.71 36.92 36.34 35.70 35.70 34.70 40.67 40.85 37.74

5: *B_subtilus*IspC 41.64 40.76 41.95 47.52 100.00 45.71 46.46 46.86 40.26 40.73 41.32 40.53 40.00 41.05 40.53 42.11 40.53 43.28 37.43 36.56

6: *C_velia*IspC 43.93 42.98 46.17 46.59 45.71 100.00 54.27 55.36 36.78 36.96 38.69 38.89 41.62 39.74 39.48 38.96 38.96 41.32 40.96 39.36

7: *A_thaliana*IspC 43.17 42.82 43.64 41.76 46.46 54.27 100.00 69.83 37.19 38.42 39.08 39.34 40.35 38.39 38.63 37.90 38.39 41.25 38.61 38.81

8: *A_protothecoides*IspC 43.32 43.64 43.30 44.93 46.86 55.36 69.83 100.00 39.16 39.53 41.71 41.01 37.91 38.68 38.93 37.91 37.66 44.56 36.70 37.56

9: *P_vivax*IspC 37.06 34.48 37.78 35.90 40.26 36.78 37.19 39.16 100.00 80.36 81.12 80.04 65.83 66.60 65.98 65.57 65.23 41.27 45.90 42.66

10: *P_cynomolgi*IspC 34.99 34.56 35.66 34.37 40.73 36.96 38.42 39.53 80.36 100.00 82.71 84.01 66.30 66.60 66.60 65.95 66.02 41.39 46.05 41.87

11: *P_inui*IspC 36.51 35.01 37.03 35.34 41.32 38.69 39.08 41.71 81.12 82.71 100.00 82.63 64.46 67.82 67.21 66.60 66.67 42.95 45.90 42.76

12: *P_knowlesi*IspC 35.69 34.22 37.03 34.71 40.53 38.89 39.34 41.01 80.04 84.01 82.63 100.00 65.91 68.23 68.02 67.21 67.48 42.56 44.10 42.02

13: *P_falciparum*IspC 35.69 34.67 35.52 36.92 40.00 41.62 40.35 37.91 65.83 66.30 64.46 65.91 100.00 73.70 72.44 73.28 72.54 40.89 44.10 41.59

14: *P_vinckei*IspC 35.69 34.93 37.03 36.34 41.05 39.74 38.39 38.68 66.60 66.60 67.82 68.23 73.70 100.00 96.77 91.72 90.47 39.59 43.33 39.29

15: *P_chabaudi*IspC 35.42 34.67 38.04 35.70 40.53 39.48 38.63 38.93 65.98 66.60 67.21 68.02 72.44 96.77 100.00 91.31 90.26 39.82 43.08 39.06

16: *P_berghei*IspC 35.42 33.60 36.78 35.70 42.11 38.96 37.90 37.91 65.57 65.95 66.60 67.21 73.28 91.72 91.31 100.00 93.71 39.82 42.31 38.82

17: *P_yoelii*IspC 34.88 33.07 36.02 34.70 40.53 38.96 38.39 37.66 65.23 66.02 66.67 67.48 72.54 90.47 90.26 93.71 100.00 38.85 42.05 38.59

18: *B_bovis*IspC 39.61 36.86 38.82 40.67 43.28 41.32 41.25 44.56 41.27 41.39 42.95 42.56 40.89 39.59 39.82 39.82 38.85 100.00 50.75 49.43

19: *T_parva*IspC 37.75 36.41 35.43 40.85 37.43 40.96 38.61 36.70 45.90 46.05 45.90 44.10 44.10 43.33 43.08 42.31 42.05 50.75 100.00 81.80

20: *T_annulata*IspC 37.95 34.96 35.92 37.74 36.56 39.36 38.81 37.56 42.66 41.87 42.76 42.02 41.59 39.29 39.06 38.82 38.59 49.43 81.80 100.00

**MSA Percent Identity Matrix - created by Clustal 2.1 for IspD enzyme**

1: *P_knowlesi*IspD 100.00 61.65 69.30 68.61 37.23 36.92 40.58 41.34 40.44 16.34 24.67 23.74 21.55 25.86 19.82 23.58 26.20 21.50 21.47 27.59

2: *P_vivax*IspD 61.65 100.00 71.92 69.26 38.37 35.43 38.10 40.15 40.33 16.67 24.59 23.92 25.96 24.14 22.03 23.56 27.95 21.40 20.25 24.83

3: *P_cynomolgi*IspD 69.30 71.92 100.00 79.60 36.53 37.24 40.64 42.17 41.49 15.56 22.02 22.40 22.00 25.86 20.26 22.17 26.64 20.77 21.10 25.00

4: *P_inui*IspD 68.61 69.26 79.60 100.00 39.89 38.40 43.27 44.01 45.05 16.22 22.10 22.41 22.29 25.00 20.26 22.64 27.07 21.55 20.21 24.91

5: *P_falciparum*IspD 37.23 38.37 36.53 39.89 100.00 43.16 46.58 48.50 49.32 13.14 24.05 23.28 22.78 23.61 17.98 18.78 25.65 20.20 21.27 25.77

6: *P_yoelii*IspD 36.92 35.43 37.24 38.40 43.16 100.00 77.88 69.16 67.66 15.47 25.00 23.58 19.37 24.46 18.06 18.75 26.09 18.31 19.18 25.18

7: *P_berghei*IspD 40.58 38.10 40.64 43.27 46.58 77.88 100.00 78.39 75.41 13.77 24.86 22.77 23.32 25.64 18.94 18.75 26.41 18.86 19.81 26.15

8: *P_chabaudi*IspD 41.34 40.15 42.17 44.01 48.50 69.16 78.39 100.00 87.96 13.56 26.24 25.29 24.25 25.75 20.26 19.23 26.96 19.93 20.19 25.44

9: *P_vinckei*IspD 40.44 40.33 41.49 45.05 49.32 67.66 75.41 87.96 100.00 13.75 26.54 25.29 23.33 25.32 18.94 19.23 26.96 20.21 20.32 26.33

10: *T_gondii*IspD 16.34 16.67 15.56 16.22 13.14 15.47 13.77 13.56 13.75 100.00 20.54 22.12 23.23 25.85 26.50 23.74 28.86 27.76 28.14 30.60

11: *T_annulata*IspD 24.67 24.59 22.02 22.10 24.05 25.00 24.86 26.24 26.54 20.54 100.00 78.23 35.65 26.61 22.47 23.11 27.71 22.95 25.36 27.93

12: *T_parva*IspD 23.74 23.92 22.40 22.41 23.28 23.58 22.77 25.29 25.29 22.12 78.23 100.00 34.10 25.32 24.23 24.53 28.14 25.52 27.86 29.30

13: *B_bovis*IspD 21.55 25.96 22.00 22.29 22.78 19.37 23.32 24.25 23.33 23.23 35.65 34.10 100.00 27.59 26.32 29.11 34.06 25.00 25.90 28.47

14: *E_coli*IspD 25.86 24.14 25.86 25.00 23.61 24.46 25.64 25.75 25.32 25.85 26.61 25.32 27.59 100.00 33.78 32.69 33.04 28.63 27.78 30.26

15: *M_avium*IspD 19.82 22.03 20.26 20.26 17.98 18.06 18.94 20.26 18.94 26.50 22.47 24.23 26.32 33.78 100.00 40.98 35.32 28.19 29.65 26.67

16: *T_thermophilus*IspD 23.58 23.56 22.17 22.64 18.78 18.75 18.75 19.23 19.23 23.74 23.11 24.53 29.11 32.69 40.98 100.00 37.50 33.80 34.45 31.88

17: *B_subtilis*IspD 26.20 27.95 26.64 27.07 25.65 26.09 26.41 26.96 26.96 28.86 27.71 28.14 34.06 33.04 35.32 37.50 100.00 35.06 35.50 37.95

18: *C_velia*IspD 21.50 21.40 20.77 21.55 20.20 18.31 18.86 19.93 20.21 27.76 22.95 25.52 25.00 28.63 28.19 33.80 35.06 100.00 43.49 40.86

19: *A_protothecoides*IspD 21.47 20.25 21.10 20.21 21.27 19.18 19.81 20.19 20.32 28.14 25.36 27.86 25.90 27.78 29.65 34.45 35.50 43.49 100.00 52.65

20: *A_thaliana*IspD 27.59 24.83 25.00 24.91 25.77 25.18 26.15 25.44 26.33 30.60 27.93 29.30 28.47 30.26 26.67 31.88 37.95 40.86 52.65 100.00

**MSA Percent Identity Matrix - created by Clustal 2.1 for IspE enzyme**

1: *B_bovis*IspE 100.00 37.63 37.99 22.64 25.39 25.39 25.87 24.32 25.77 24.62 25.95 25.38 21.21 28.14 26.64 29.63 24.62 24.24 26.34 19.18

2: *T_parva*IspE 37.63 100.00 83.95 28.32 27.41 27.11 26.87 26.09 26.95 27.33 26.47 26.43 21.56 21.02 23.79 25.61 22.22 26.27 25.00 20.99

3: *T_annulata*IspE 37.99 83.95 100.00 27.22 26.89 26.59 26.05 25.00 24.62 26.51 25.73 25.30 20.19 21.43 24.19 25.69 23.08 23.31 24.59 19.08

4: *P_falciparum*IspE 22.64 28.32 27.22 100.00 50.00 49.79 50.30 49.80 48.79 48.28 49.90 48.28 18.24 25.85 28.78 28.79 21.48 24.61 23.94 18.82

5: *P_chabaudi*IspE 25.39 27.41 26.89 50.00 100.00 91.87 86.51 83.73 53.55 53.05 53.86 52.85 20.91 27.36 29.67 31.78 17.93 24.90 24.41 18.09

6: *P_vinckei*IspE 25.39 27.11 26.59 49.79 91.87 100.00 84.52 82.54 53.55 52.85 54.07 52.64 20.91 27.67 29.67 30.53 18.33 24.11 24.41 17.73

7: *P_berghei*ispE 25.87 26.87 26.05 50.30 86.51 84.52 100.00 89.88 51.59 52.10 53.29 52.10 20.00 27.04 28.57 31.15 19.12 23.32 24.41 17.02

8: *P_yoelii*IspE 24.32 26.09 25.00 49.80 83.73 82.54 89.88 100.00 52.99 51.90 53.49 52.30 21.52 27.44 29.30 30.61 19.92 24.90 24.02 17.02

9: *P_knowlesi*IspE 25.77 26.95 24.62 48.79 53.55 53.55 51.59 52.99 100.00 78.30 80.28 77.91 20.99 28.75 26.84 27.41 21.51 26.59 24.41 19.50

10: *P_vivax*IspE 24.62 27.33 26.51 48.28 53.05 52.85 52.10 51.90 78.30 100.00 86.79 84.42 20.14 29.07 27.57 29.60 20.32 26.59 22.83 19.15

11: *P_cynomolgi*IspE 25.95 26.47 25.73 49.90 53.86 54.07 53.29 53.49 80.28 86.79 100.00 90.93 19.74 26.84 27.44 28.17 20.72 26.19 23.46 19.86

12: *P_inui*IspE 25.38 26.43 25.30 48.28 52.85 52.64 52.10 52.30 77.91 84.42 90.93 100.00 19.91 27.48 26.47 28.66 19.52 26.19 24.02 19.50

13: *T_gondii*IspE 21.21 21.56 20.19 18.24 20.91 20.91 20.00 21.52 20.99 20.14 19.74 19.91 100.00 31.97 33.70 32.74 26.80 35.56 28.02 29.60

14: *C_velia*IspE 28.14 21.02 21.43 25.85 27.36 27.67 27.04 27.44 28.75 29.07 26.84 27.48 31.97 100.00 47.40 40.69 28.57 35.02 33.46 27.15

15: *A_protothecoides*IspE 26.64 23.79 24.19 28.78 29.67 29.67 28.57 29.30 26.84 27.57 27.44 26.47 33.70 47.40 100.00 47.70 28.02 33.07 30.00 28.82

16: *A_thaliana*IspE 29.63 25.61 25.69 28.79 31.78 30.53 31.15 30.61 27.41 29.60 28.17 28.66 32.74 40.69 47.70 100.00 27.48 30.89 31.85 25.08

17: *E_coli*IspE 24.62 22.22 23.08 21.48 17.93 18.33 19.12 19.92 21.51 20.32 20.72 19.52 26.80 28.57 28.02 27.48 100.00 34.27 29.34 24.82

18: *T_thermophilus*IspE 24.24 26.27 23.31 24.61 24.90 24.11 23.32 24.90 26.59 26.59 26.19 26.19 35.56 35.02 33.07 30.89 34.27 100.00 35.50 34.80

19: *B_subtilus*IspE 26.34 25.00 24.59 23.94 24.41 24.41 24.41 24.02 24.41 22.83 23.46 24.02 28.02 33.46 30.00 31.85 29.34 35.50 100.00 33.69

20: *M_avium*IspE 19.18 20.99 19.08 18.82 18.09 17.73 17.02 17.02 19.50 19.15 19.86 19.50 29.60 27.15 28.82 25.08 24.82 34.80 33.69 100.00

**MSA Percent Identity Matrix - created by Clustal 2.1 for IspF enzyme**

1: *P_inui*IspF 100.00 84.08 83.08 83.74 49.30 50.46 50.00 50.93 51.83 28.00 29.63 25.91 28.49 30.11 30.60 26.53 34.07 37.31 29.38 29.24

2: *P_cynomolgi*IspF 84.08 100.00 87.08 84.03 53.19 55.56 54.70 55.13 55.93 30.37 30.57 28.78 33.00 33.00 34.00 30.92 35.90 40.76 33.98 33.87

3: *P_vivax*IspF 83.08 87.08 100.00 85.87 53.16 54.81 54.39 54.39 55.19 29.29 30.57 27.10 31.88 32.37 34.67 28.77 35.90 40.76 31.02 31.44

4: *P_knowlesi*IspF 83.74 84.03 85.87 100.00 53.85 56.78 56.36 56.36 57.14 27.41 29.94 28.97 33.00 33.50 33.33 27.57 35.90 40.13 32.56 32.12

5: *P_falciparum*IspF 49.30 53.19 53.16 53.85 100.00 60.34 60.34 59.92 60.67 27.03 29.30 27.23 34.87 33.85 32.67 31.34 37.18 38.85 33.66 32.60

6: *P_vinckei*IspF 50.46 55.56 54.81 56.78 60.34 100.00 91.46 86.18 85.77 25.81 30.57 28.99 33.17 34.17 32.00 31.55 38.46 41.03 32.38 32.24

7: *P_chabaudi*IspF 50.00 54.70 54.39 56.36 60.34 91.46 100.00 86.18 86.59 25.81 29.30 29.47 32.16 33.17 31.33 31.07 37.82 40.38 31.43 31.69

8: *P_berghei*IspF 50.93 55.13 54.39 56.36 59.92 86.18 86.18 100.00 91.87 26.88 29.94 29.95 33.67 34.17 32.67 31.55 37.18 41.67 31.90 31.15

9: *P_yoelii*IspF 51.83 55.93 55.19 57.14 60.67 85.77 86.59 91.87 100.00 26.20 29.30 28.85 33.50 34.00 32.00 30.43 37.82 40.38 31.75 31.52

10: *T_gondii*IspF 28.00 30.37 29.29 27.41 27.03 25.81 25.81 26.88 26.20 100.00 33.33 31.75 35.94 34.90 39.47 37.37 39.24 45.91 38.92 36.51

11: *M_avium*IspF 29.63 30.57 30.57 29.94 29.30 30.57 29.30 29.94 29.30 33.33 100.00 34.39 31.85 31.85 40.94 32.70 38.71 39.35 33.54 32.08

12: *B_bovis*IspF 25.91 28.78 27.10 28.97 27.23 28.99 29.47 29.95 28.85 31.75 34.39 100.00 40.00 42.00 36.42 30.29 36.31 37.82 27.40 31.89

13: *T_parva*IspF 28.49 33.00 31.88 33.00 34.87 33.17 32.16 33.67 33.50 35.94 31.85 40.00 100.00 86.67 39.74 37.37 43.95 46.15 40.82 47.31

14: *T_annulata*IspF 30.11 33.00 32.37 33.50 33.85 34.17 33.17 34.17 34.00 34.90 31.85 42.00 86.67 100.00 40.40 38.38 42.68 47.44 38.78 46.77

15: *T_thermophilus*IspF 30.60 34.00 34.67 33.33 32.67 32.00 31.33 32.67 32.00 39.47 40.94 36.42 39.74 40.40 100.00 41.45 35.53 42.76 44.08 44.74

16: *C_velia*IspF 26.53 30.92 28.77 27.57 31.34 31.55 31.07 31.55 30.43 37.37 32.70 30.29 37.37 38.38 41.45 100.00 43.04 46.20 49.07 49.48

17: *B_subtilus*IspF 34.07 35.90 35.90 35.90 37.18 38.46 37.82 37.18 37.82 39.24 38.71 36.31 43.95 42.68 35.53 43.04 100.00 63.06 48.10 48.73

18: *E_coli*IspF 37.31 40.76 40.76 40.13 38.85 41.03 40.38 41.67 40.38 45.91 39.35 37.82 46.15 47.44 42.76 46.20 63.06 100.00 47.77 49.69

19: *A_thaliana*IspF 29.38 33.98 31.02 32.56 33.66 32.38 31.43 31.90 31.75 38.92 33.54 27.40 40.82 38.78 44.08 49.07 48.10 47.77 100.00 67.02

20: *A_protothecoides*IspF 29.24 33.87 31.44 32.12 32.60 32.24 31.69 31.15 31.52 36.51 32.08 31.89 47.31 46.77 44.74 49.48 48.73 49.69 67.02 100.00

**MSA Percent Identity Matrix - created by Clustal 2.1 for IspG enzyme**

1: *P_vivax*IspG 100.00 83.42 83.45 85.45 65.91 67.86 68.00 66.71 66.45 39.97 42.90 44.31 39.31 44.27 43.78 43.96 42.74 32.34 33.54 28.20 34.23 33.87

2: *P_knowlesi*IspG 83.42 100.00 81.91 85.47 67.05 68.38 69.02 68.14 67.25 38.90 42.24 43.89 38.92 45.33 44.70 42.72 42.56 31.74 32.32 27.33 33.63 33.55

3: *P_cynomolgi*IspG 83.45 81.91 100.00 86.29 65.46 66.38 66.72 66.55 65.87 39.16 40.26 40.15 38.29 42.45 42.34 41.04 41.09 27.83 30.22 28.45 29.57 31.63

4: *P_inui*IspG 85.45 85.47 86.29 100.00 67.47 67.79 68.93 67.30 66.92 39.75 42.39 44.20 38.78 45.19 44.70 43.27 43.39 33.23 33.54 27.91 33.63 33.87

5: *P_falciparum*IspG 65.91 67.05 65.46 67.47 100.00 71.88 72.34 72.01 71.62 38.72 41.94 45.16 38.75 45.84 45.49 43.67 45.83 33.53 33.84 28.78 32.43 33.55

6: *P_chabaudi*IspG 67.86 68.38 66.38 67.79 71.88 100.00 97.15 91.09 91.89 38.10 42.69 45.14 39.03 44.05 44.25 44.00 43.86 32.34 34.45 27.33 32.43 33.87

7: *P_vinckei*IspG 68.00 69.02 66.72 68.93 72.34 97.15 100.00 92.12 92.57 39.02 42.69 45.45 39.11 44.85 45.05 45.06 44.70 32.63 34.76 27.62 32.73 33.55

8: *P_berghei*IspG 66.71 68.14 66.55 67.30 72.01 91.09 92.12 100.00 94.99 38.43 41.81 45.14 39.42 43.66 44.00 44.57 43.87 32.34 33.84 28.20 33.63 33.55

9: *P_yoelii*IspG 66.45 67.25 65.87 66.92 71.62 91.89 92.57 94.99 100.00 38.10 42.40 45.30 39.74 43.91 43.97 44.41 44.14 32.04 34.45 28.20 33.63 33.55

10: *T_gondii*IspG 39.97 38.90 39.16 39.75 38.72 38.10 39.02 38.43 38.10 100.00 47.60 48.59 44.50 38.88 39.11 42.18 43.35 32.19 35.15 30.55 33.24 33.71

11: *C_velia*IspG 42.90 42.24 40.26 42.39 41.94 42.69 42.69 41.81 42.40 47.60 100.00 60.35 55.26 44.55 44.40 45.59 45.49 32.65 31.61 29.86 33.73 31.11

12: *C_reinhardtii*IspG 44.31 43.89 40.15 44.20 45.16 45.14 45.45 45.14 45.30 48.59 60.35 100.00 62.89 46.03 46.17 46.15 47.27 32.74 34.46 33.23 33.23 33.12

13: *A_thaliana*IsPG 39.31 38.92 38.29 38.78 38.75 39.03 39.11 39.42 39.74 44.50 55.26 62.89 100.00 42.60 43.00 42.40 42.92 31.04 33.64 31.47 34.55 32.26

14: *T_annulata*IspG 44.27 45.33 42.45 45.19 45.84 44.05 44.85 43.66 43.91 38.88 44.55 46.03 42.60 100.00 90.76 55.67 62.63 29.86 31.53 29.60 32.74 31.35

15: *T_parva*IspG 43.78 44.70 42.34 44.70 45.49 44.25 45.05 44.00 43.97 39.11 44.40 46.17 43.00 90.76 100.00 55.21 62.58 30.32 31.42 29.48 32.05 32.18

16: *B_bovis*IspG 43.96 42.72 41.04 43.27 43.67 44.00 45.06 44.57 44.41 42.18 45.59 46.15 42.40 55.67 55.21 100.00 62.78 32.65 33.54 29.94 32.93 31.53

17: *B_equi*IspG 42.74 42.56 41.09 43.39 45.83 43.86 44.70 43.87 44.14 43.35 45.49 47.27 42.92 62.63 62.58 62.78 100.00 33.14 32.82 31.29 34.64 32.69

18: *T_thermophilus*IspG 32.34 31.74 27.83 33.23 33.53 32.34 32.63 32.34 32.04 32.19 32.65 32.74 31.04 29.86 30.32 32.65 33.14 100.00 38.33 36.57 37.78 40.62

19: *E_coli*IspG 33.54 32.32 30.22 33.54 33.84 34.45 34.76 33.84 34.45 35.15 31.61 34.46 33.64 31.53 31.42 33.54 32.82 38.33 100.00 40.86 46.47 46.22

20: *M_avium*IspG 28.20 27.33 28.45 27.91 28.78 27.33 27.62 28.20 28.20 30.55 29.86 33.23 31.47 29.60 29.48 29.94 31.29 36.57 40.86 100.00 45.45 49.86

21: *B_subtilus*IspG 34.23 33.63 29.57 33.63 32.43 32.43 32.73 33.63 33.63 33.24 33.73 33.23 34.55 32.74 32.05 32.93 34.64 37.78 46.47 45.45 100.00 49.58

22: *A_aeolicus*IspG 33.87 33.55 31.63 33.87 33.55 33.87 33.55 33.55 33.55 33.71 31.11 33.12 32.26 31.35 32.18 31.53 32.69 40.62 46.22 49.86 49.58 100.00

**MSA Percent Identity Matrix - created by Clustal 2.1 for IspH enzyme**

1: *A_thaliana*IspH 100.00 50.22 26.83 23.47 25.34 27.92 25.32 26.23 25.97 26.11 26.14 21.89 24.12 24.06 25.16 24.80 24.54 23.30 26.40 24.15

2: *A_protothecoides*IspH 50.22 100.00 23.92 25.79 29.18 30.65 25.75 27.04 24.50 25.77 24.63 20.47 22.44 21.57 23.40 21.23 26.58 24.31 26.35 25.66

3: *B_subtilus*IspH 26.83 23.92 100.00 32.14 35.22 33.56 36.21 32.89 34.22 32.03 32.56 35.22 34.22 33.89 33.67 33.22 37.87 32.23 33.22 34.56

4: *T_thermophilus*IspH 23.47 25.79 32.14 100.00 43.91 48.08 39.75 37.42 36.16 36.58 36.16 36.48 36.79 36.48 36.91 37.11 40.69 37.11 38.05 38.38

5: *E_coli*IspH 25.34 29.18 35.22 43.91 100.00 50.49 45.69 40.26 40.58 37.88 39.62 39.62 40.58 40.26 40.06 40.58 46.47 44.73 42.17 42.61

6: *M_avium*IspH 27.92 30.65 33.56 48.08 50.49 100.00 45.20 42.86 40.56 40.26 41.36 39.02 39.38 38.51 38.44 37.58 46.65 44.06 41.56 42.31

7: *C_velia*IspH 25.32 25.75 36.21 39.75 45.69 45.20 100.00 43.01 42.29 39.75 42.07 35.66 38.41 38.82 45.24 36.55 34.79 42.86 46.43 48.56

8: *P_inui*IspH 26.23 27.04 32.89 37.42 40.26 42.86 43.01 100.00 80.88 84.64 85.34 64.92 67.55 72.83 72.24 66.06 47.70 54.33 54.35 55.56

9: *P_knowlesi*IspH 25.97 24.50 34.22 36.16 40.58 40.56 42.29 80.88 100.00 80.79 81.99 61.34 63.06 65.17 71.22 60.56 42.79 48.81 51.72 54.24

10: *P_cynomolgi*IspH 26.11 25.77 32.03 36.58 37.88 40.26 39.75 84.64 80.79 100.00 88.64 57.96 59.56 63.16 70.35 57.73 42.76 50.14 50.63 52.73

11: *P_vivax*IspH 26.14 24.63 32.56 36.16 39.62 41.36 42.07 85.34 81.99 88.64 100.00 63.32 65.42 68.80 71.99 61.76 44.58 51.52 52.68 54.05

12: *P_falciparum*IspH 21.89 20.47 35.22 36.48 39.62 39.02 35.66 64.92 61.34 57.96 63.32 100.00 62.95 67.41 75.60 58.79 38.93 48.68 53.03 53.25

13: *P_chabaudi*IspH 24.12 22.44 34.22 36.79 40.58 39.38 38.41 67.55 63.06 59.56 65.42 62.95 100.00 91.69 88.20 83.61 42.45 48.53 53.28 53.72

14: *P_vinckei*IspH 24.06 21.57 33.89 36.48 40.26 38.51 38.82 72.83 65.17 63.16 68.80 67.41 91.69 100.00 85.30 83.79 43.57 48.81 53.52 54.05

15: *P_berghei*IspH 25.16 23.40 33.67 36.91 40.06 38.44 45.24 72.24 71.22 70.35 71.99 75.60 88.20 85.30 100.00 91.88 50.14 52.17 53.25 55.48

16: *P_yoelii*IspH 24.80 21.23 33.22 37.11 40.58 37.58 36.55 66.06 60.56 57.73 61.76 58.79 83.61 83.79 91.88 100.00 38.70 47.59 51.39 51.89

17: *T_gondii*IspH 24.54 26.58 37.87 40.69 46.47 46.65 34.79 47.70 42.79 42.76 44.58 38.93 42.45 43.57 50.14 38.70 100.00 45.48 50.28 52.68

18: *B_bovis*IspH 23.30 24.31 32.23 37.11 44.73 44.06 42.86 54.33 48.81 50.14 51.52 48.68 48.53 48.81 52.17 47.59 45.48 100.00 57.57 60.57

19: *T_parva*IspH 26.40 26.35 33.22 38.05 42.17 41.56 46.43 54.35 51.72 50.63 52.68 53.03 53.28 53.52 53.25 51.39 50.28 57.57 100.00 90.57

20: *T_annulata*IspH 24.15 25.66 34.56 38.38 42.61 42.31 48.56 55.56 54.24 52.73 54.05 53.25 53.72 54.05 55.48 51.89 52.68 60.57 90.57 100.00

**Analysis for Isoprenoids biosynthesis (MEP) pathways enzymes in *P. falciparum*:**

1. ***Pf*DXS:**

**Apicoplast targeting peptide prediction:**

| Query sequence: (Please note, that only the first 150 AA have been considered for the analysis.)  > *P_falciparum*DXS  MIFNYVFFKNFVPVVLYILLIIYINLNGMNNKNQIKTEKI  YIKKLNRLSRKNSLCSSKNKIACLFDIGNDDNRNTTYGYN  VNVKNDDINSLLKNNYSNKLYMDKRKNINNVISTNKISGS  ISNICSRNQKENEQKRNKQRCLTQCHTYNM  **Complete PlasmoAP output for query :**  **The submitted sequence CONTAINS an apicoplast targeting signal:**   | **Criterion** | **Value** | **Decision** | | --- | --- | --- | | **Signalpeptide** | 3 of 4 tests positive | **+** | | **apicoplast-targeting peptide** | 5 of 5 tests positive | **++** | | Ruleset 1 | | | | Ratio acidic/basic residues in first 22 amino acids <=0.7 | 0.143 | yes | | Does a KN-enriched region exist (40 AA with min. 9 K or N) with a ratio acidic/basic <=0.9 | 0.200 | yes | | Ruleset 2 | | | | number of acidic residues in first 15 amino acids (<=2) | 1 | yes | | Does a KN-enriched region exist (40 AA with min. 9 K or N) ? Ratio acidic/basic residues in this region <0.6 | 0.200 | yes | | Is the first charged amino acid basic ? |  | yes |   Explanation of the output: The final decision is indicated by "++, +, 0 or -", where apicoplast-localization for a given sequence is considered.  ++ very likely  + likely  0 undecided  - unlikely |
| --- | --- | --- | --- | --- | --- | --- | --- | --- | --- | --- | --- | --- | --- | --- | --- | --- | --- | --- | --- | --- | --- | --- | --- | --- | --- | --- | --- | --- | --- | --- |

1. ***Pf*IspC**

**Apicoplast targeting peptide prediction:**

| Query sequence: (Please note, that only the first 150 AA have been considered for the analysis.)  > *P_falciparum*IspC  MKKYIYIYFFFITITINDLVINNTSKCVSIERRKNNAYIN  YGIGYNGPDNKITKSRRCKRIKLCKKDLIDIGAIKKPINV  AIFGSTGSIGTNALNIIRECNKIENVFNVKALYVNKSVNE  LYEQAREFLPEYLCIHDKSVYEELKELVKN  **Complete PlasmoAP output for query :**  **The submitted sequence DOES NOT contain an apicoplast targeting signal:**   | **Criterion** | **Value** | **Decision** | | --- | --- | --- | | **Signalpeptide** | 2 of 4 tests positive | **0** | | **apicoplast-targeting peptide** | 5 of 5 tests positive | **++** | | Ruleset 1 | | | | Ratio acidic/basic residues in first 22 amino acids <=0.7 | 0.500 | yes | | Does a KN-enriched region exist (40 AA with min. 9 K or N) with a ratio acidic/basic <=0.9 | 0.333 | yes | | Ruleset 2 | | | | number of acidic residues in first 15 amino acids (<=2) | 0 | yes | | Does a KN-enriched region exist (40 AA with min. 9 K or N) ? Ratio acidic/basic residues in this region <0.6 | 0.333 | yes | | Is the first charged amino acid basic ? |  | yes | |
| --- | --- | --- | --- | --- | --- | --- | --- | --- | --- | --- | --- | --- | --- | --- | --- | --- | --- | --- | --- | --- | --- | --- | --- | --- | --- | --- | --- | --- | --- | --- |

**3. *Pf*IspD**

**Apicoplast targeting peptide prediction:**

| Query sequence: (Please note, that only the first 150 AA have been considered for the analysis.)  > *P_falciparum*IspD  MHFVHTFIRCVLLIYFIKWNGYNFHMLKRQFFKNGKNIIE  RSIRKCKKNNFSKSYHSIVYIKNGVTQYMCKNKKRGRGEQ  KKNIIINNKYLFLLNNFIDKNKDKTYLSTSLERKYLKNQK  DDAHKIWKNRIKNYKSINIYMSKIEEKSTK  **Complete PlasmoAP output for query :**  **The submitted sequence CONTAINS an apicoplast targeting signal:**   | **Criterion** | **Value** | **Decision** | | --- | --- | --- | | **Signalpeptide** | 3 of 4 tests positive | **+** | | **apicoplast-targeting peptide** | 5 of 5 tests positive | **++** | | Ruleset 1 | | | | Ratio acidic/basic residues in first 22 amino acids <=0.7 | 0.167 | yes | | Does a KN-enriched region exist (40 AA with min. 9 K or N) with a ratio acidic/basic <=0.9 | 0.083 | yes | | Ruleset 2 | | | | number of acidic residues in first 15 amino acids (<=2) | 0 | yes | | Does a KN-enriched region exist (40 AA with min. 9 K or N) ? Ratio acidic/basic residues in this region <0.6 | 0.083 | yes | | Is the first charged amino acid basic ? |  | yes | |
| --- | --- | --- | --- | --- | --- | --- | --- | --- | --- | --- | --- | --- | --- | --- | --- | --- | --- | --- | --- | --- | --- | --- | --- | --- | --- | --- | --- | --- | --- | --- |

**4. *Pf*IspE**

**Apicoplast targeting peptide prediction:**

| Query sequence: (Please note, that only the first 150 AA have been considered for the analysis.)  > *P_falciparum*IspE  MNQFLNLKCVLFYFFCTHLFFLHVITKHNLKKEKGYIIRN  DYKCKRKRKNNNLKKRSFFIICKNCRPNNNKFYIINNKGG  ENIYNVKKKKACGYVRLNNEANVEKNNVVNTNKEIEKLLL  DVLDNRNNWYDSKYFSPAKINLFLRLKEKK  **Complete PlasmoAP output for query :**  **The submitted sequence DOES NOT contain an apicoplast targeting signal:**   | **Criterion** | **Value** | **Decision** | | --- | --- | --- | | **Signalpeptide** | 2 of 4 tests positive | **0** | | **apicoplast-targeting peptide** | 5 of 5 tests positive | **++** | | Ruleset 1 | | | | Ratio acidic/basic residues in first 22 amino acids <=0.7 | 0.000 | yes | | Does a KN-enriched region exist (40 AA with min. 9 K or N) with a ratio acidic/basic <=0.9 | 0.111 | yes | | Ruleset 2 | | | | number of acidic residues in first 15 amino acids (<=2) | 0 | yes | | Does a KN-enriched region exist (40 AA with min. 9 K or N) ? Ratio acidic/basic residues in this region <0.6 | 0.111 | yes | | Is the first charged amino acid basic ? |  | yes | |
| --- | --- | --- | --- | --- | --- | --- | --- | --- | --- | --- | --- | --- | --- | --- | --- | --- | --- | --- | --- | --- | --- | --- | --- | --- | --- | --- | --- | --- | --- | --- |

**5. *Pf*IspF**

**Apicoplast targeting peptide prediction:**

| Query sequence: (Please note, that only the first 150 AA have been considered for the analysis.)  > *P_falciparum*IspF  MFLKGYTSNVVLIILTFFILLTKEEKNIKNNISGYCFLNF  GLKKNAIIKKREKQNLKLFCYNGIRIGQGYDIHKIKVLDE  EYNTYANNDFNKNEQSFKTLTLGGVKINNVLVLSHSDGDI  IYHSIVDSILGALGSLDIGTLFPDKDEKNK  **Complete PlasmoAP output for query :**  **The submitted sequence DOES NOT contain an apicoplast targeting signal:**   | **Criterion** | **Value** | **Decision** | | --- | --- | --- | | **Signalpeptide** | 2 of 4 tests positive | **0** | | **apicoplast-targeting peptide** | 5 of 5 tests positive | **++** | | Ruleset 1 | | | | Ratio acidic/basic residues in first 22 amino acids <=0.7 | 0.000 | yes | | Does a KN-enriched region exist (40 AA with min. 9 K or N) with a ratio acidic/basic <=0.9 | 0.500 | yes | | Ruleset 2 | | | | number of acidic residues in first 15 amino acids (<=2) | 0 | yes | | Does a KN-enriched region exist (40 AA with min. 9 K or N) ? Ratio acidic/basic residues in this region <0.6 | 0.500 | yes | | Is the first charged amino acid basic ? |  | yes | |
| --- | --- | --- | --- | --- | --- | --- | --- | --- | --- | --- | --- | --- | --- | --- | --- | --- | --- | --- | --- | --- | --- | --- | --- | --- | --- | --- | --- | --- | --- | --- |

**6. *Pf*IspG**

**Apicoplast targeting peptide prediction:**

| Query sequence: (Please note, that only the first 150 AA have been taken into account for the analysis.)  > *P_falciparum*IspG  MSYIKRLILFMLLFYSHVKIKKLFIKISNVNIFFAEAKKN  GKKEFFLFLLNIKKNSQQKKTYHITKRNTINKSDFLYSLL  NEEGNSSKKEYKNLKDEEKYNIIQNIKKYCECTKKYKRLP  TREVVIGNVKIGGNNKIAIQTMASCDTRNV  **Complete PlasmoAP output for query :**  **The submitted sequence CONTAINS an apicoplast targeting signal:**   | **Criterion** | **Value** | **Decision** | | --- | --- | --- | | **Signalpeptide** | 3 of 4 tests positive | **+** | | **apicoplast-targeting peptide** | 5 of 5 tests positive | **++** | | Ruleset 1 | | | | Ratio acidic/basic residues in first 22 amino acids <=0.7 | 0.167 | yes | | Does a KN-enriched region exist (40 AA with min. 9 K or N) with a ratio acidic/basic <=0.9 | 0.182 | yes | | Ruleset 2 | | | | number of acidic residues in first 15 amino acids (<=2) | 0 | yes | | Does a KN-enriched region exist (40 AA with min. 9 K or N) ? Ratio acidic/basic residues in this region <0.6 | 0.182 | yes | | Is the first charged amino acid basic ? |  | yes | |
| --- | --- | --- | --- | --- | --- | --- | --- | --- | --- | --- | --- | --- | --- | --- | --- | --- | --- | --- | --- | --- | --- | --- | --- | --- | --- | --- | --- | --- | --- | --- |

**7. *Pf*IspH**

**Apicoplast targeting peptide prediction:**

| Query sequence: (Please note, that only the first 150 AA have been considered for the analysis.)  >*P_falciparum*IspH  MSVTTFCSLKKTDKCNIYISKRAFSVFLFYLFFFLFFHFY  FLCSSSFAVIIHESEKRKNIMRRKRSILQIFENSIKSKEG  KCNFTKRYITHYYNIPLKIKKHDLPSVIKYFSHKPNGKHN  YVTNMITQKNRKSFLFFFFLYNKYFFGKQE  **Complete PlasmoAP output for P_falciparumIspH :**  **The submitted sequence DOES NOT contain an apicoplast targeting signal:**   | **Criterion** | **Value** | **Decision** | | --- | --- | --- | | **Signalpeptide** | 0 of 4 tests positive | **-** | | **apicoplast-targeting peptide** | 3 of 5 tests positive | **-** | | Ruleset 1 | | | | Ratio acidic/basic residues in first 22 amino acids <=0.7 | 0.200 | yes | | Does a KN-enriched region exist (40 AA with min. 9 K or N) with a ratio acidic/basic <=0.9 | 0.000 | no | | Ruleset 2 | | | | number of acidic residues in first 15 amino acids (<=2) | 1 | yes | | Does a KN-enriched region exist (40 AA with min. 9 K or N) ? Ratio acidic/basic residues in this region <0.6 | 0.000 | no | | Is the first charged amino acid basic ? |  | yes | |
| --- | --- | --- | --- | --- | --- | --- | --- | --- | --- | --- | --- | --- | --- | --- | --- | --- | --- | --- | --- | --- | --- | --- | --- | --- | --- | --- | --- | --- | --- | --- |

**The transcriptome expression level of MEP pathway enzymes from *P. falciparum* in various stages**

The mRNA expression levels of diverse enzymes participating in the MEP pathway were retrieved from the PlasmoDB server [59]. Expression levels were assessed across various stages, commencing with red blood cell (RBC) invasion at 0 hours, progressing through distinct phases including Ring, trophozoite, and schizont stages. Within this transcriptomic analysis, expression levels were additionally juxtaposed among different parasite lines of *P. falciparum* (Dd2, HB3, and 3D7). A marginal disparity in the expression profiles was noted, wherein the expression levels of *P. falciparum* 3D7 (Chloroquine-sensitive) and Dd2 (Chloroquine-resistant) strains exhibited greater alignment compared to the HB3 (Chloroquine-sensitive) strain.

***P. falciparum* DXS**


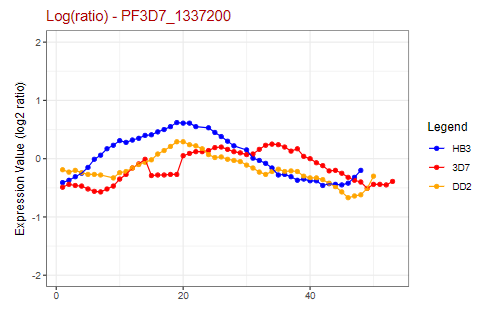


***P. falciparum* IspC**


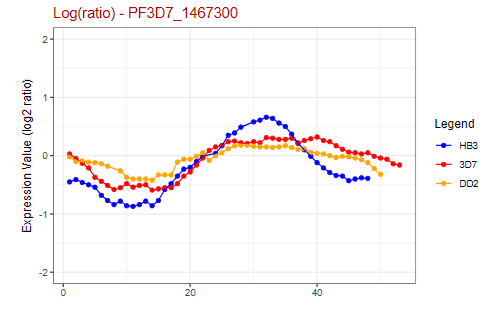


***P. falciparum* IspD**


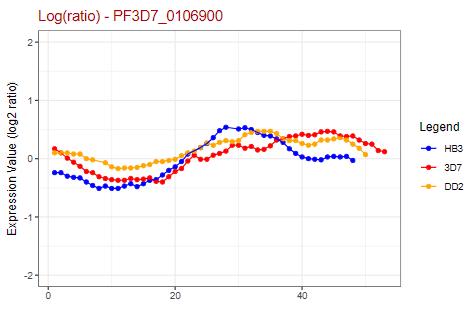


***P. falciparum* IspE**


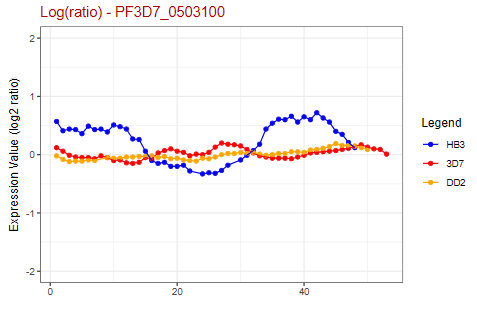


***P. falciparum* IspF**


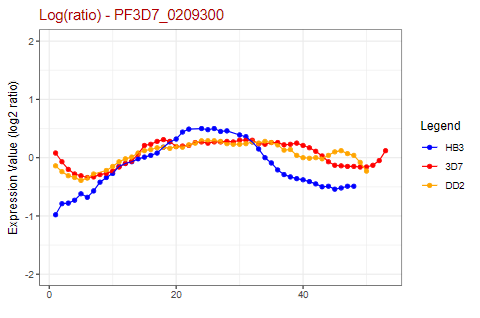


***P. falciparum* IspG**


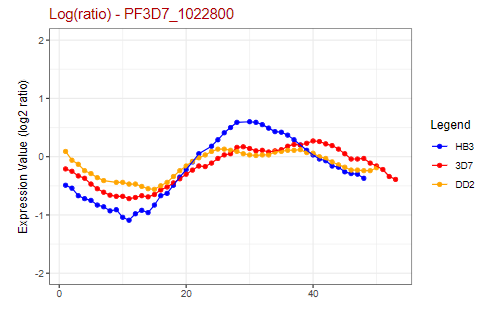


***P. falciparum* IspH**


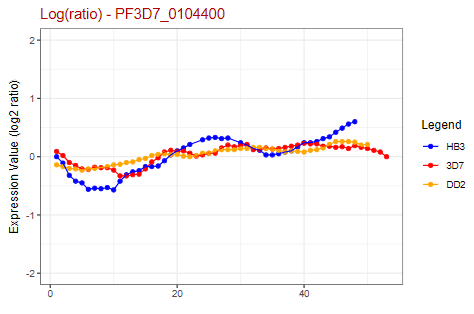


**Extended Materials and Methods:**

A three-dimensional (3D) model of the MEP pathway enzyme was constructed through homology modeling using the MODELLER 9v13 program [71]. Amino acid sequences obtained from PlasmoDB [25] were submitted to the HHpred online server [70] for template search, where the best result was determined based on sequence similarity and template structure resolution. Crystal structures available for similar proteins in the database were selected as templates for protein structure prediction. Discrete Optimized Protein Energy (DOPE) scores were calculated for each structure, and the structure with the minimum DOPE score was chosen for further analysis. Lower sequence identity observed with prokaryotic enzymes due to the presence of NEAT sequences was addressed by removing targeting sequences before submitting the selected region for protein modeling. This process yielded 3D models of the targets with all non-hydrogen atoms without user intervention.

The best model, as determined by the minimum DOPE score, underwent further structural refinement through energy minimization and molecular simulation using the GROMACS 4.6 software package [72]. Energy minimization (EM) and molecular dynamics (MD) were performed to achieve optimal protein folding. GROMOS 96 force field and the flexible SPC (Simple Point Charge) water model were utilized. A decahedron box of 0.7 Å was selected to determine the simulation box size, and water was added as a solvent using pre-equilibrated water coordinates from SPC. Short energy minimization was initially conducted to check for any broken hydrogen bond network in water that could lead to structural distortion. Standard cutoff values of 1.0 nm were used for neighbor list generation and Coulomb and Lennard-Jones interactions. The Particle-Mesh-Ewald (PME) summation method was employed for calculating electrostatic interactions, with energies and other statistical data stored every 10 steps.

Macromolecular structure validation was carried out using various online servers to assess the reliability of the three-dimensional protein structures. PROCHECK, VERIFY3D, and ERRAT were employed for the quality evaluation of the models in terms of the environment profile. Atomic contacts and packing of side chains in the final refined models were evaluated using the WHAT IF program. Z-scores calculated by the server confirmed the good quality of the structures. Comprehensive assessment and evaluation of the generated models were performed through Ramachandran plot analysis using RAMPAGE. Root-Mean-Square Deviation (RMSD) values were calculated by superimposing the template and modeled protein structures using Chimera. RMSD values in the range of 0.583 Å to 0.824 Å between the backbone atoms of the template and protein models indicated significant homology between the structures.

**Substrate docking and *In-silico* drug inhibition study**

The identification of a binding site for substrates is a distinctive feature of proteins involved in various enzymatic reactions. Using the BioLip online server [73], binding pockets comprising conserved amino acid residues were identified. Docking studies were then conducted based on the confidence score (C-score ranging from 0 to 1) obtained for these binding sites, utilizing Molegro Virtual Docker (MVD) [74]. In the initial step, coordinates for the proteins, substrate molecules, and drugs were stored as a PDB file using Discovery Studio 3.5 Client (BIOVIA, US) and uploaded to the workspace of MVD. The workspace in MVD serves as a central component, encompassing all information such as molecules (proteins, ligands, cofactors, water molecules, and poses), user-defined constraints (visualized as small spheres), cavities (visualized as a grid mesh), and various graphical objects (molecular surfaces, backbone visualizations, labels, etc.).

For this analysis, the chemical structures of the substrates and inhibitor molecules were obtained from the PubChem open chemistry and ChEMBL-NTD databases [75]. These chemical structures were then refined using LIGPREP v2.5, developed by Schrodinger LLC.

Binding cavities on these proteins were identified and selected as constraints for docking. The docking process was initiated and automatically terminated after 2000 iterations (or about 100,000 evaluations), with the expectation that a good solution would be found within approximately 800 iterations. Subsequently, docking results were imported from the output directory, along with the pose organizer. In the pose organizer, all poses were manually analyzed to examine the interactions between protein and ligand molecules. The affinity of conserved amino acid residues towards substrate ligands was studied, focusing on hydrogen bonds, electrostatic interactions, and steric interactions.

Concurrently, screening was conducted to assess the inhibition process of these proteins. Drug molecules known to inhibit prokaryotic isoprenoid biosynthesis were docked against *Plasmodium* proteins. The interactions of conserved amino acid residues were scrutinized and compared with the amino acids interacting with substrate molecules. The effect of different drug molecules was assessed based on the level of interactions observed.

Top of Form

**Molecular Dynamics for ligand-docked proteins**

The obtained ligand-protein complex was subjected to energy minimization and molecular dynamics simulation. This is a complicated multistep process and is divided into the following subparts.

1. Generate topology
2. Define box and solvate
3. Add ions to the system
4. Energy minimization
5. Equilibration
6. Molecular dynamics
7. Analysis

In the initial step, the coordinates of the ligand were separated from the protein-ligand complex, and topology was generated separately for the protein and ligand molecules using the GROMACS87 force field. Once the topology was generated for both molecules, a complex topology was prepared by manually adding the ligand topology to the protein topology file. The next step involved determining the type and size of the box required for the simulation process. Three types of boxes can be used in simulation studies: triclinic, cubic, and octahedron, where the box size varies with the size of the protein. The protein-ligand complex, defined in the most favorable box, was solvated using the SPC (Simple Point Charge) water model system. The protein molecule in the solvated system carries a particular positive or negative charge, which was neutralized by using sodium or chloride ions.

During molecular simulation studies, hydrogen bonds are added to atoms, which may decrease the distance between the atoms, leading to collisions. To prevent this, energy minimization was performed, where required parameters were added in the form of an em.mdp (energy minimization molecular dynamics parameter) file, specifying steps and the cut-off scheme. After the completion of energy minimization, the system was equilibrated at the optimum temperature and pressure, with high control over both, achieved by using specific coupling group treatments in parameter files.

Following the two equilibration phases, the system was well-equilibrated and ready for running molecular dynamics (MD) simulations for data collection. The process of molecular simulation is similar to energy minimization, with required parameters added in the form of an md.mdp file, and the simulation can be run for 1 to 5 nanoseconds. Finally, the obtained results were analyzed, and the protein structure before and after simulation was compared.
